# Supplementary material
Source: publisher figshare collection journal article supplement (https://acs.figshare.com/ndownloader/files/4141849)
Supplement: Supplementary file 1 [file 4141849]

# Utilization of Phosphinoamide Ligands in Homobimetallic Fe and Mn Complexes: The Effect of Vastly Different Coordination Environments on Metal-Metal Interactions and Magnetic and Redox Properties

Subramaniam Kuppuswamy,<sup>†</sup> Mark W. Bezpalko,<sup>†</sup> Tamara M. Powers,<sup>□</sup> Mark M. Turnbull,<sup>‡</sup> Bruce M. Foxman,<sup>†</sup> and Christine M. Thomas<sup>†\*</sup>

<sup>†</sup>*Department of Chemistry, Brandeis University, 415 South Street, Waltham, Massachusetts 02454.*

<sup>‡</sup>*Carlson School of Chemistry and Biochemistry, Clark University, 950 Main Street, Worcester, Massachusetts 01610.* <sup>□</sup> *Department of Chemistry and Chemical Biology, Harvard University, Cambridge, Massachusetts 02139*

| <i>Index</i>                                                                                                                                                                    | <i>Page</i> |
|---------------------------------------------------------------------------------------------------------------------------------------------------------------------------------|-------------|
| <b><u>NMR Spectra</u></b>                                                                                                                                                       |             |
| <sup>1</sup> H, <sup>13</sup> C{ <sup>1</sup> H}, and <sup>31</sup> P{ <sup>1</sup> H} NMR spectrum of [ <sup>i</sup> PrNKPPPh <sub>2</sub> ] <sub>2</sub> ( <b>1</b> )         | S3-S4       |
| <sup>1</sup> H, <sup>13</sup> C{ <sup>1</sup> H}, and <sup>31</sup> P{ <sup>1</sup> H} NMR spectrum of [MesNKP <sup>i</sup> Pr <sub>2</sub> ] <sub>2</sub> ( <b>2</b> )         | S5-S6       |
| <sup>1</sup> H NMR spectrum of [Fe( <sup>i</sup> PrNPPPh <sub>2</sub> ) <sub>3</sub> Fe( <sup>i</sup> PrNPPPh <sub>2</sub> )] ( <b>4</b> )                                      | S7          |
| <sup>1</sup> H NMR spectrum of [FeMesNP <sup>i</sup> Pr <sub>2</sub> ] <sub>3</sub> FeCl] ( <b>6</b> )                                                                          | S8          |
| <sup>1</sup> H NMR spectrum of [(THF)Fe(μ-I)(MesNP <sup>i</sup> Pr <sub>2</sub> ) <sub>2</sub> FeI] ( <b>7</b> )                                                                | S9          |
| <sup>1</sup> H NMR spectrum of [Fe(N <sup>i</sup> PrP <sup>i</sup> Pr <sub>2</sub> ) <sub>2</sub> (P <sup>i</sup> Pr <sub>2</sub> N <sup>i</sup> Pr)FeCl] ( <b>9</b> )          | S10         |
| <b><u>Cyclic Voltammetry</u></b>                                                                                                                                                |             |
| CV of complexes <b>3</b> , <b>4</b> , <b>6</b> , and <b>8</b>                                                                                                                   | S11-S14     |
| <b><u>Magnetic Susceptibility Data</u></b>                                                                                                                                      |             |
| Additional magnetic susceptibility data for <b>5</b> and <b>8</b>                                                                                                               | S15-S19     |
| <b><u>Computational Results</u></b>                                                                                                                                             |             |
| Calculated frontier MO diagram for <b>4</b> .                                                                                                                                   | S20         |
| <b><u>Mössbauer Spectra</u></b>                                                                                                                                                 |             |
| Discussion of alternative fits for Mossbauer spectra of <b>6</b> and <b>7</b>                                                                                                   | S21         |
| <b><u>X-ray Structural Experimental Details</u></b>                                                                                                                             |             |
| Molecular structure diagram and X-ray crystal structure solution of [Mn( <sup>i</sup> PrNPPPh <sub>2</sub> ) <sub>3</sub> Mn( <sup>i</sup> PrNPPPh <sub>2</sub> )] ( <b>3</b> ) | S25-S27     |

|                                                                                                                                                                                                                                       |         |
|---------------------------------------------------------------------------------------------------------------------------------------------------------------------------------------------------------------------------------------|---------|
| Molecular structure diagram and X-ray crystal structure solution of<br>[Fe( <sup>i</sup> PrNPPPh <sub>2</sub> ) <sub>3</sub> Fe( <sup>i</sup> PrNPPPh <sub>2</sub> )] ( <b>4</b> )                                                    | S28-S30 |
| Molecular structure diagram and X-ray crystal structure solution of<br>[(THF)Mn(μ-Cl)(MesNP <sup>i</sup> Pr <sub>2</sub> ) <sub>3</sub> Mn(MesNP <sup>i</sup> Pr <sub>2</sub> )] ( <b>5</b> )                                         | S31-S32 |
| Molecular structure diagram and X-ray crystal structure solution of<br>[Fe(MesNP <sup>i</sup> Pr <sub>2</sub> ) <sub>3</sub> FeCl] ( <b>6</b> )                                                                                       | S33-S34 |
| Molecular structure diagram and X-ray crystal structure solution of<br>[(THF)Fe(μ-I)(MesNP <sup>i</sup> Pr <sub>2</sub> ) <sub>2</sub> FeI] ( <b>7</b> )                                                                              | S35-S36 |
| Molecular structure diagram and X-ray crystal structure solution of<br>(THF) <sub>3</sub> LiCl[Mn(N <sup>i</sup> PrP <sup>i</sup> Pr <sub>2</sub> ) <sub>2</sub> (P <sup>i</sup> Pr <sub>2</sub> N <sup>i</sup> Pr)MnCl] ( <b>8</b> ) | S37-S39 |
| Molecular structure diagram and X-ray crystal structure solution of<br>[Fe(N <sup>i</sup> PrP <sup>i</sup> Pr <sub>2</sub> ) <sub>2</sub> (P <sup>i</sup> Pr <sub>2</sub> N <sup>i</sup> Pr)FeCl] ( <b>9</b> )                        | S40-S41 |
| <b><u>Computational Details</u></b>                                                                                                                                                                                                   |         |
| Full reference for Gaussian09                                                                                                                                                                                                         | S42     |
| XYZ Coordinates of Optimized geometries of <b>4</b> , <b>6</b> , and <b>9</b>                                                                                                                                                         | S43-S53 |
| <b><u>References</u></b>                                                                                                                                                                                                              | S54     |

**Figure S1.**  $^1\text{H}$  NMR spectrum of  $[\text{}^i\text{PrNKPPH}_2]_2$  (**1**) in  $\text{THF-}d_8$ .

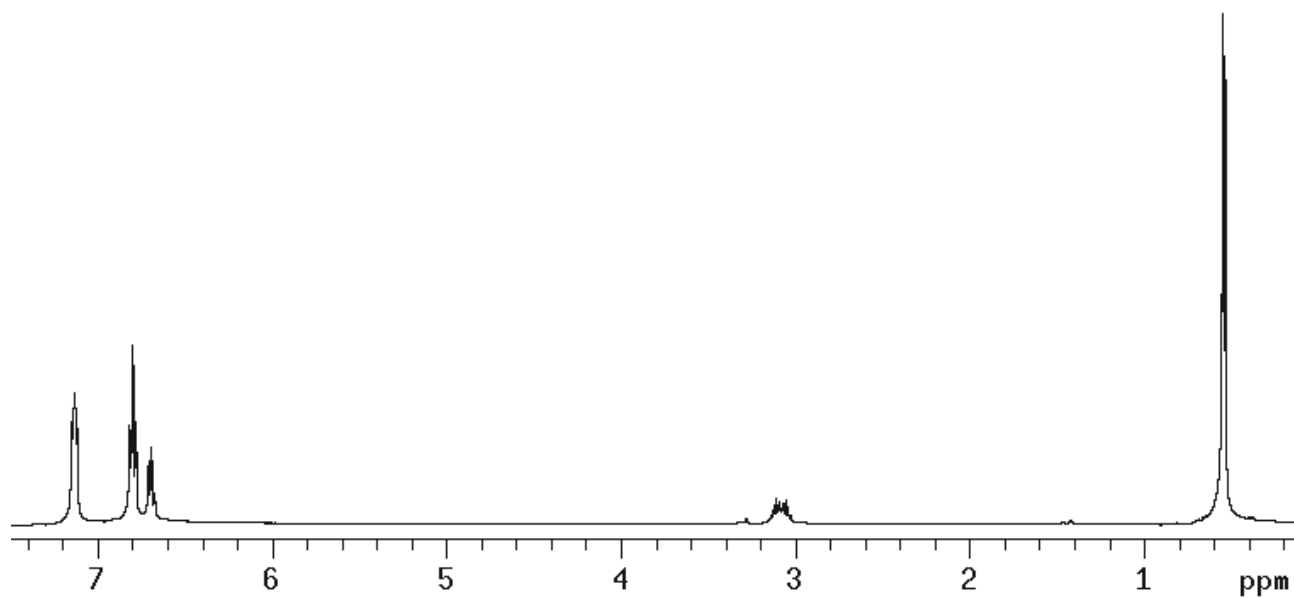

**Figure S2.**  $^{13}\text{C}\{^1\text{H}\}$  NMR spectrum of  $[\textit{i}\text{PrNKPPh}_2]_2$  (**1**) in  $\text{THF-}d_8$ .

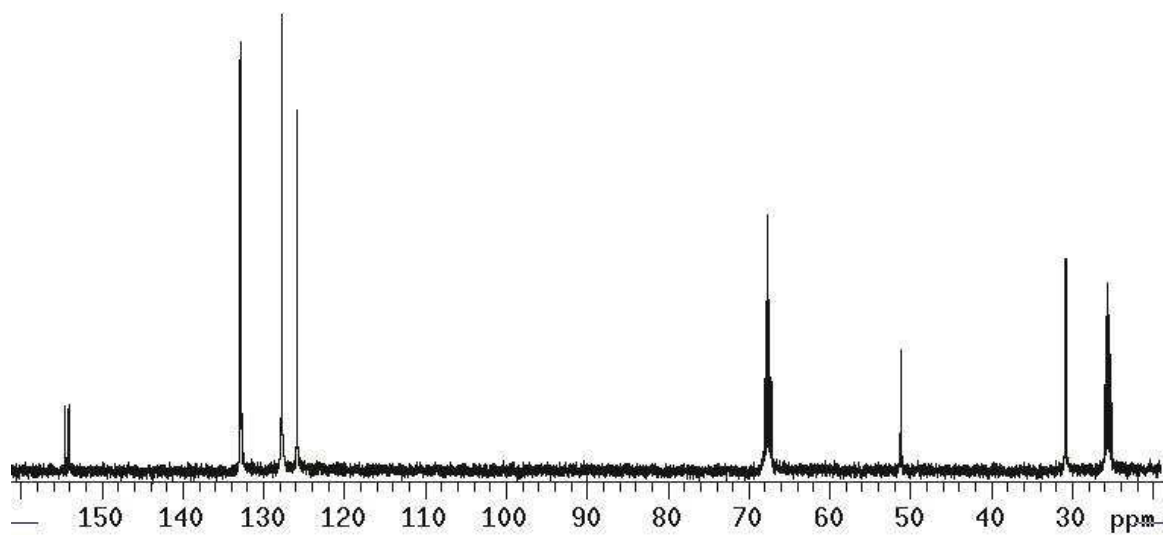

**Figure S3.**  $^{31}\text{P}\{^1\text{H}\}$  NMR spectrum of  $[\textit{i}\text{PrNKPPh}_2]_2$  (**1**) in  $\text{THF-}d_8$ .

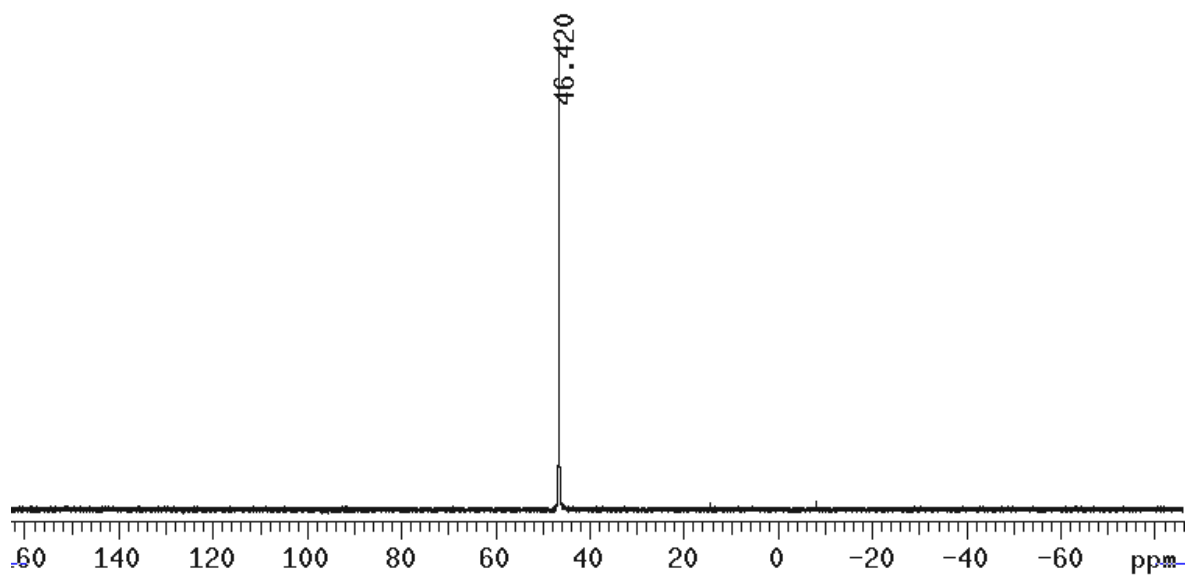

**Figure S4.**  $^1\text{H}$  NMR spectrum of  $[\text{MesNKP}^i\text{Pr}_2]_2$  (**2**) in  $\text{THF-}d_8$

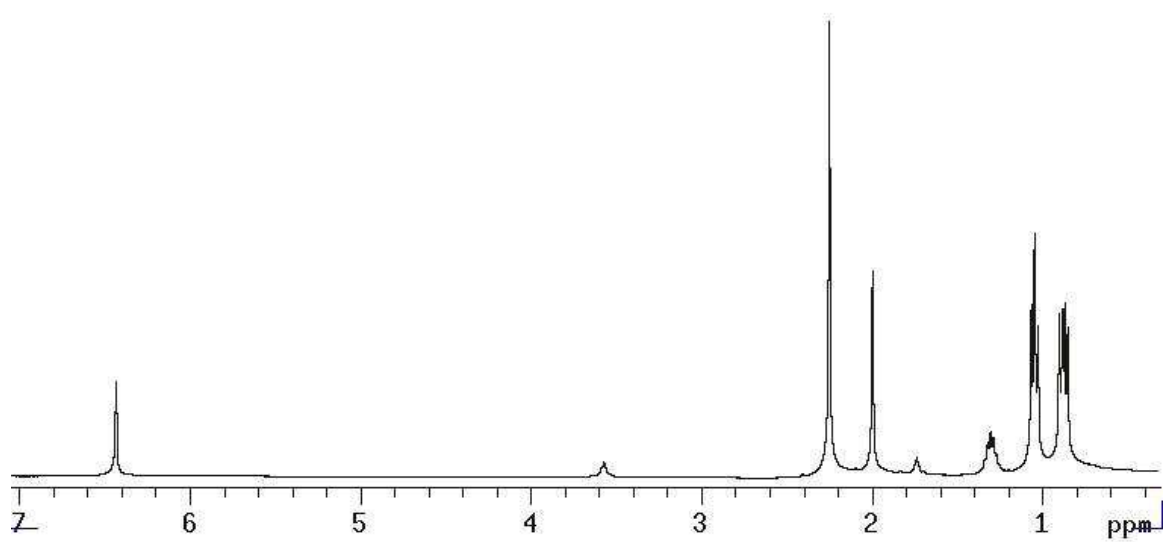

**Figure S5.**  $^{13}\text{C}\{^1\text{H}\}$  NMR spectrum of  $[\text{MesNKP}^i\text{Pr}_2]_2$  (**2**) in  $\text{THF-}d_8$ .

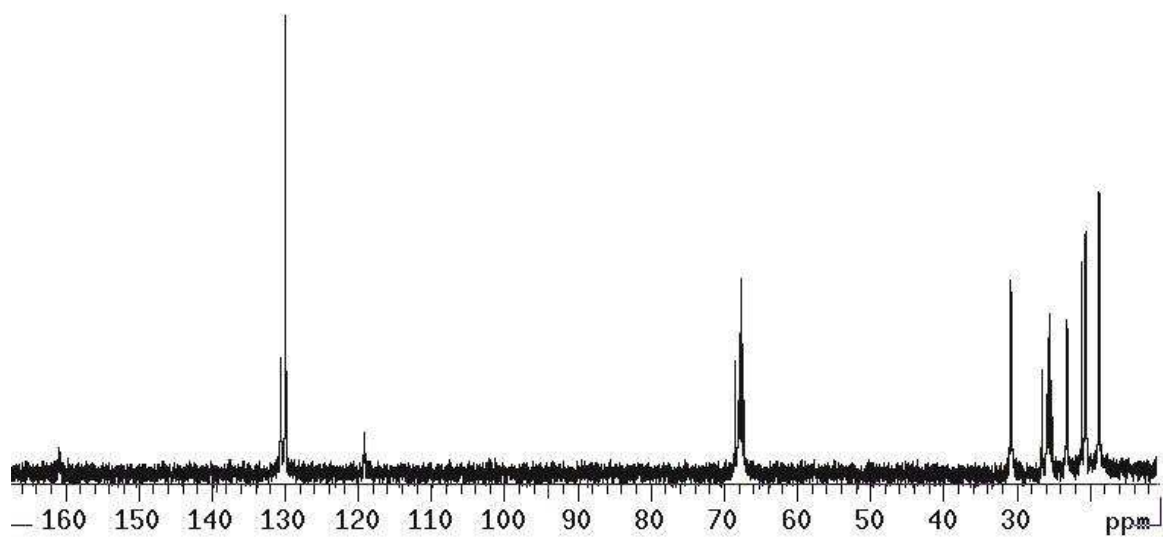

**Figure S6.**  $^{31}\text{P}\{^1\text{H}\}$  NMR spectrum of  $[\text{MesNKP}^i\text{Pr}_2]_2$  (**2**) in  $\text{THF-}d_8$ .

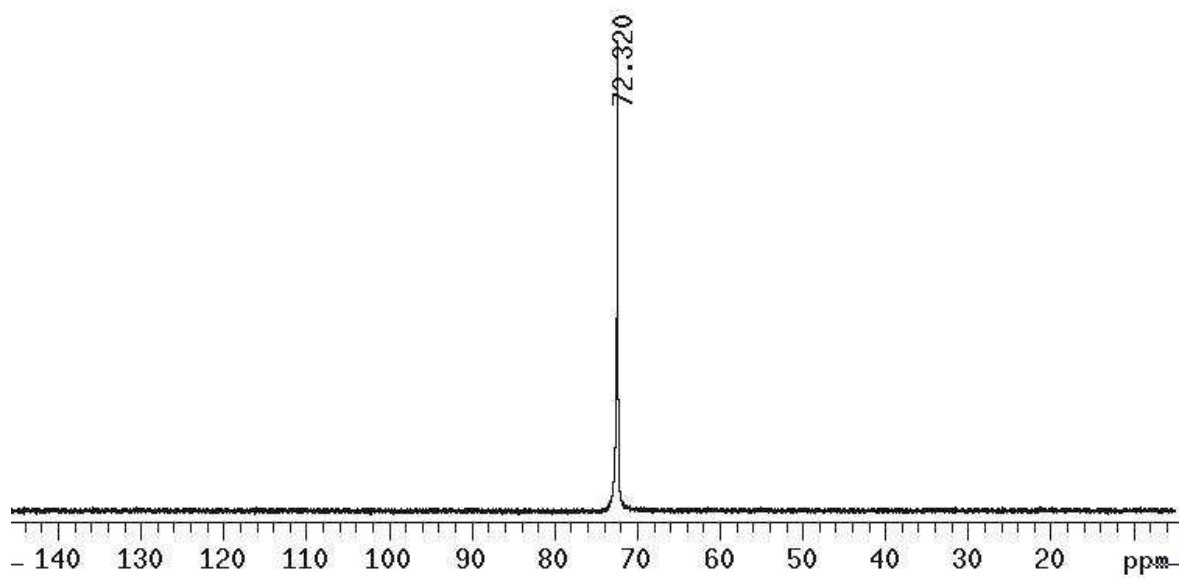

**Figure S7.**  $^1\text{H}$  NMR spectrum of  $[\text{Fe}(^i\text{PrNPh}_2)_3\text{Fe}(^i\text{PrNPh}_2)]$  (**4**) in  $\text{C}_6\text{D}_6$ .

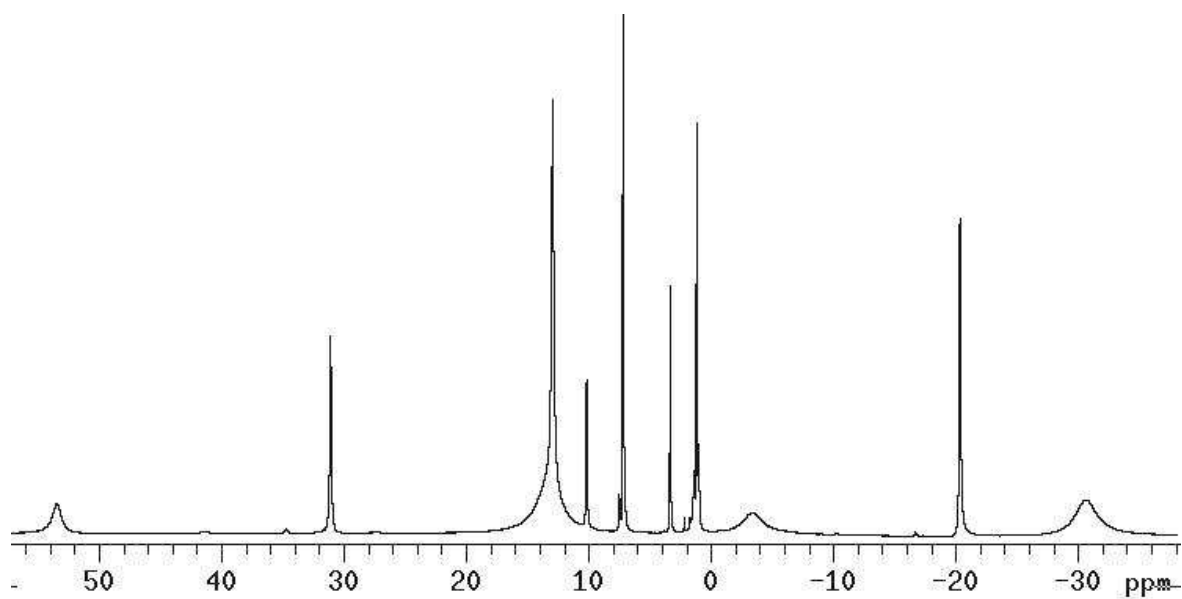

**Figure S8.**  $^1\text{H}$  NMR spectrum of  $[\text{Fe}(\text{MesNP}^i\text{Pr}_2)_3\text{FeCl}]$  (**6**) in  $\text{C}_6\text{D}_6$ .

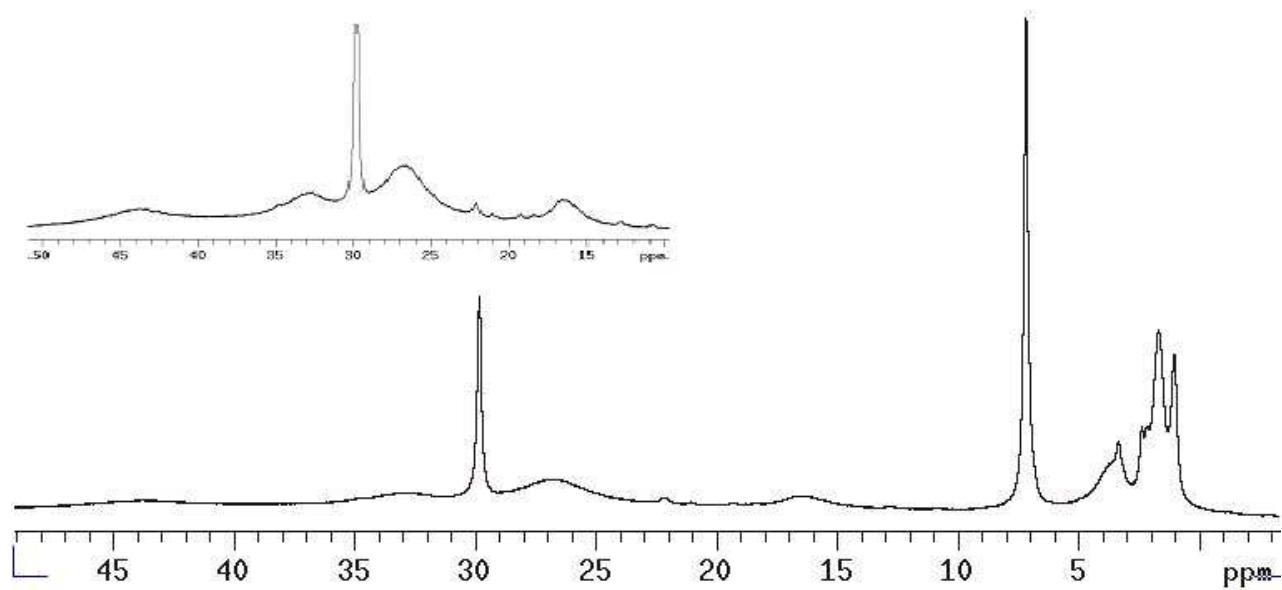



**Figure S9.**  $^1\text{H}$  NMR spectrum of  $[(\text{THF})\text{Fe}(\mu\text{-I})(\text{MesNP}^i\text{Pr}_2)_3\text{FeI}]$  (**7**) in  $\text{C}_6\text{D}_6$ .

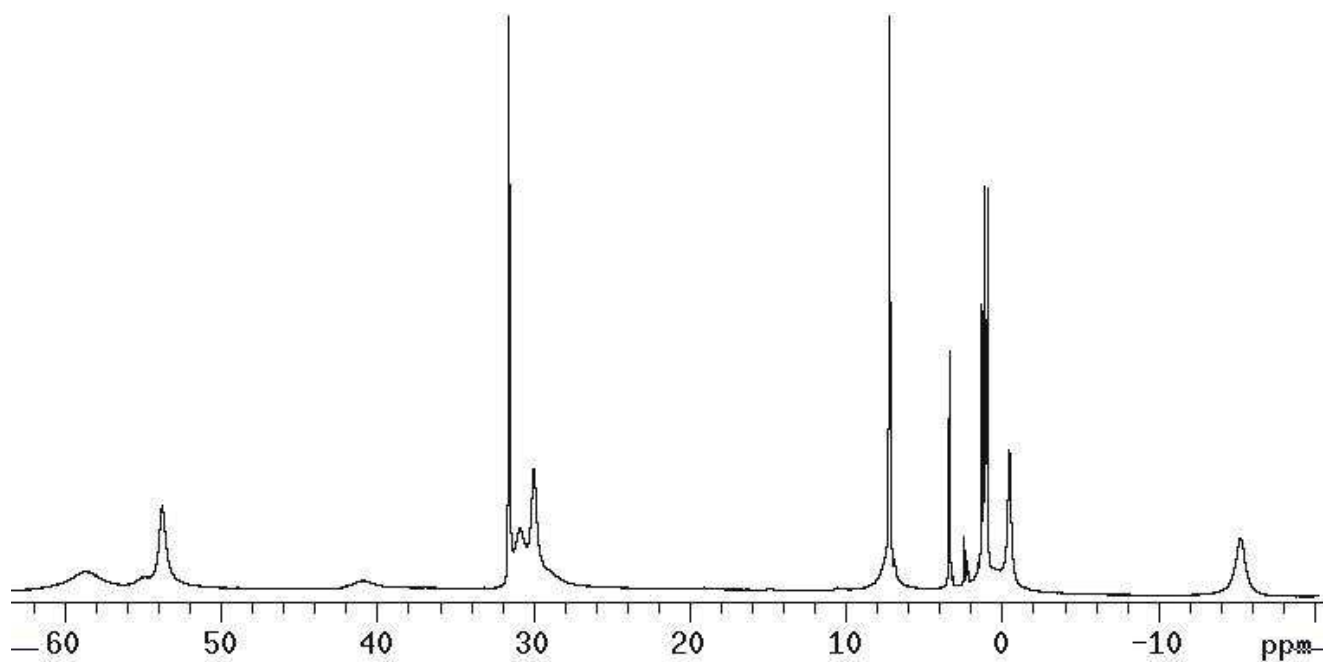

**Figure S10.**  $^1\text{H}$  NMR spectrum of  $[\text{Fe}(\text{N}^i\text{PrP}^i\text{Pr}_2)_2(\text{P}^i\text{Pr}_2\text{N}^i\text{Pr})\text{FeCl}]$  (**9**) in  $\text{C}_6\text{D}_6$ .

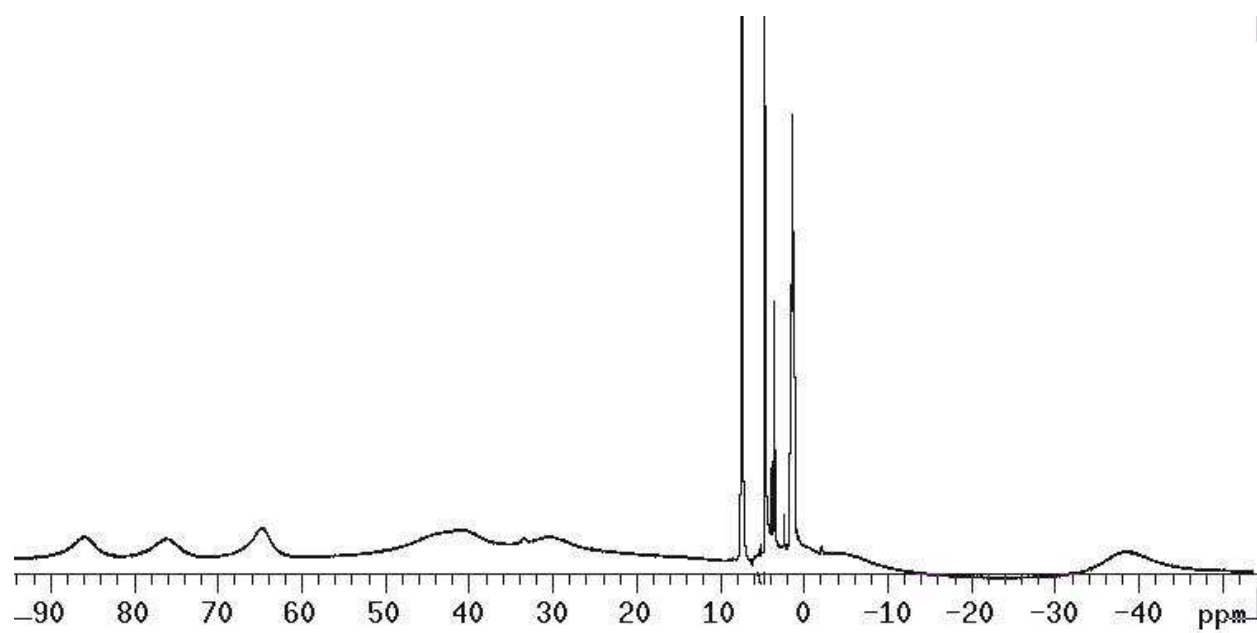

**Figure S11.** Full cyclic voltammogram of  $[\text{Mn}(^i\text{PrNPPh}_2)_3\text{Mn}(^i\text{PrNPPh}_2)]$  (**3**) (2 mM in 0.4 M  $[\text{nBu}_4\text{N}][\text{PF}_6]$  in THF, scan rate = 100 mV/s).

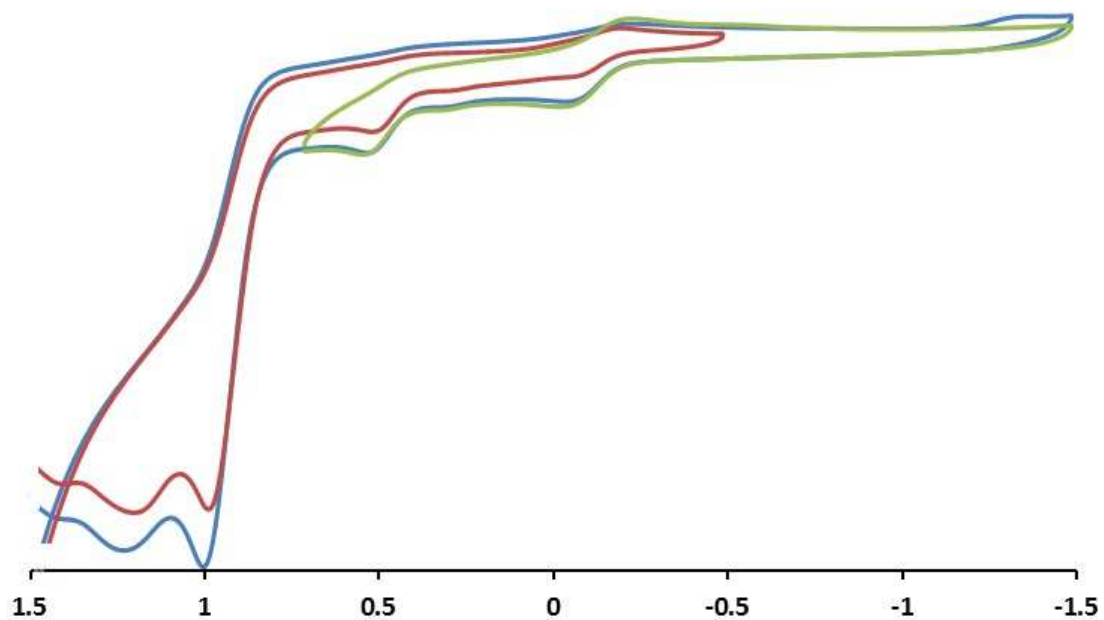

**Figure S12.** Cyclic voltammogram of  $[\text{Fe}(\text{}^i\text{PrNPPH}_2)_3\text{Fe}(\text{}^i\text{PrNPPH}_2)]$  (**4**) (2 mM in 0.4 M  $[\text{}^n\text{Bu}_4\text{N}][\text{PF}_6]$  in THF, scan rate = 100 mV/s), including scans of several different potential windows to identify artifacts of irreversible processes.

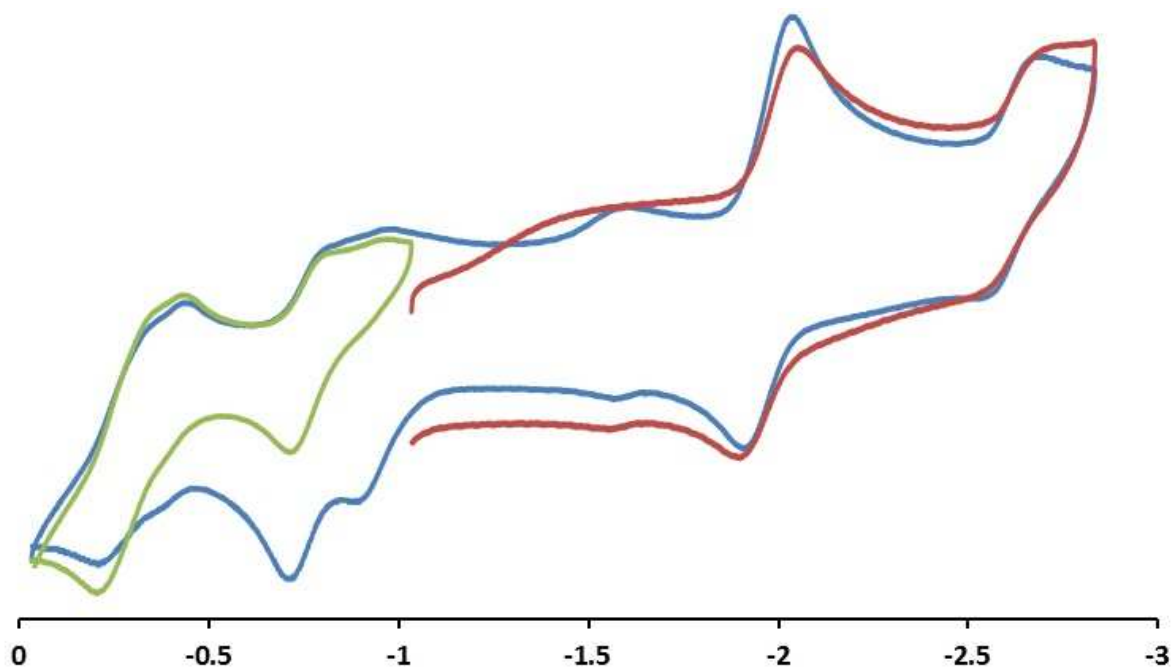

**Figure S13.** Cyclic voltammogram of  $[\text{Fe}(\text{MesNP}^i\text{Pr}_2)_3\text{FeCl}]$  (**6**) (2 mM in 0.4 M  $[\text{nBu}_4\text{N}][\text{PF}_6]$  in THF, scan rate = 100 mV/s).

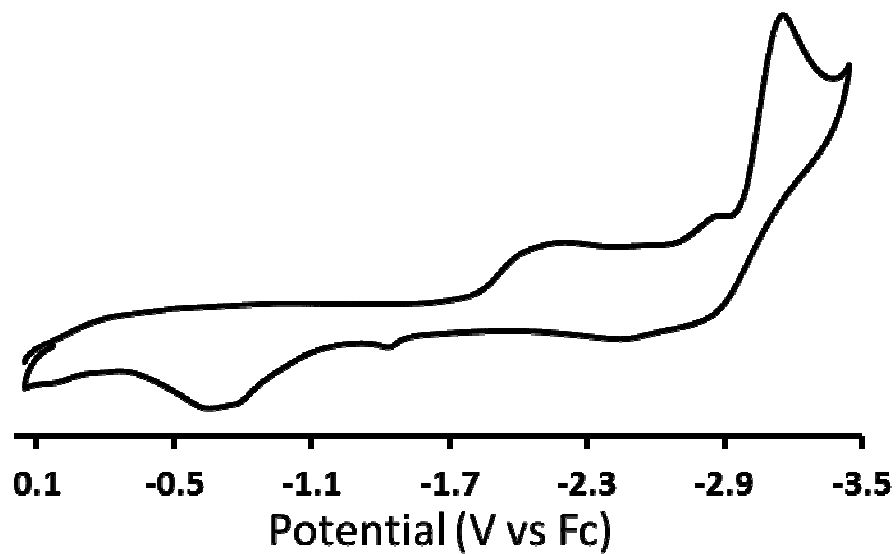

**Figure S14.** Cyclic voltammogram of  $(\text{THF})_3\text{LiCl}[\text{Mn}(\text{N}^i\text{PrP}^i\text{Pr}_2)_2(\text{P}^i\text{Pr}_2\text{N}^i\text{Pr})\text{MnCl}]$  (**8**) (2 mM in 0.4 M  $[\text{nBu}_4\text{N}][\text{PF}_6]$  in THF, scan rate = 100 mV/s).

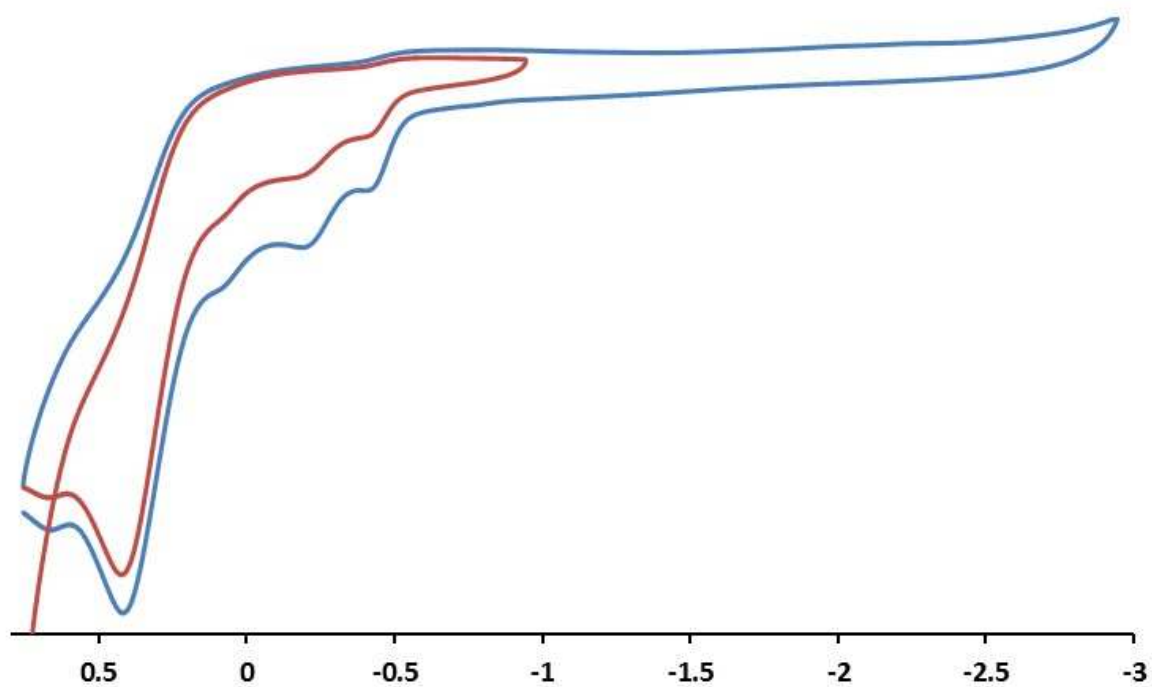

**Figure S15.** Plot of magnetization as a function of field collected for **3**.

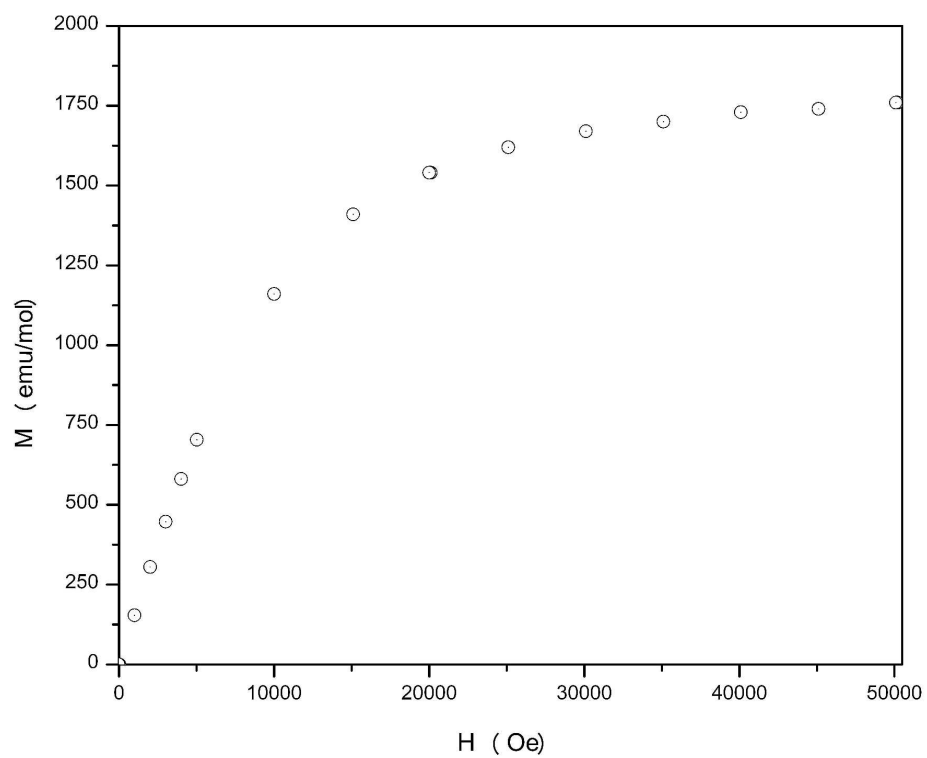

**Figure S16.** Plot of magnetization as a function of field collected for **5**.

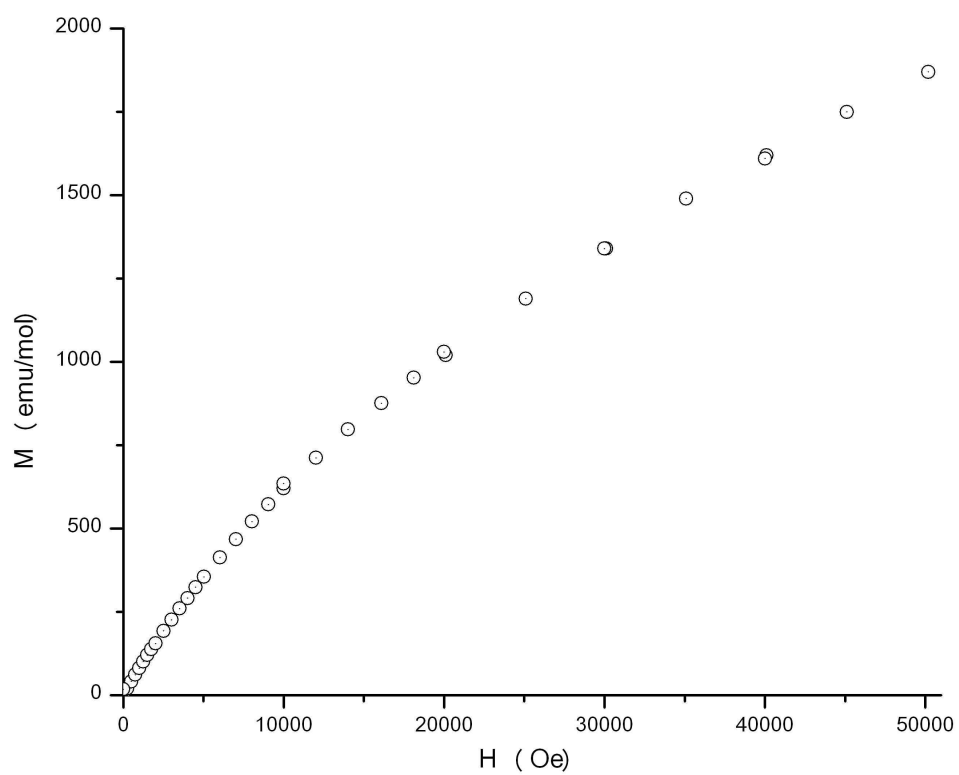



**Figure S17.** Uncorrected plot of magnetic susceptibility as a function of temperature for **5**.

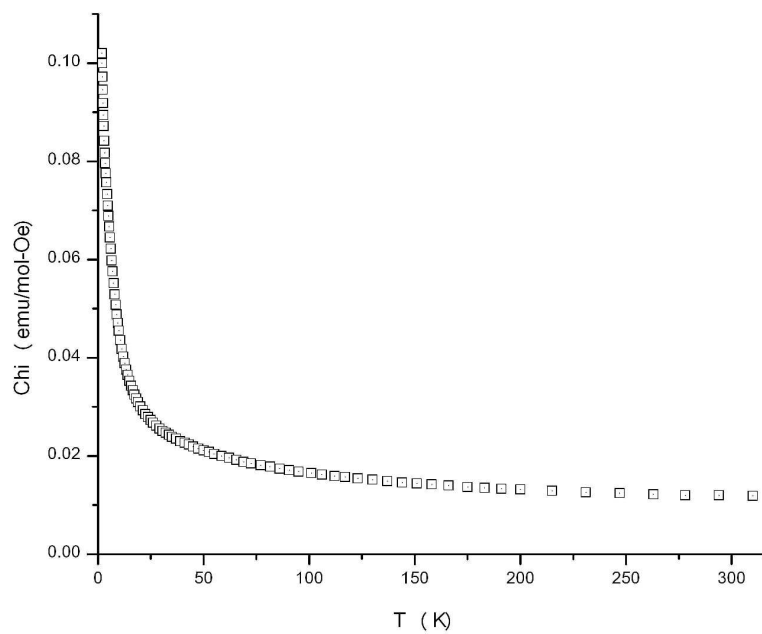

**Figure S18.** Plot of magnetization as a function of field collected for **8**.

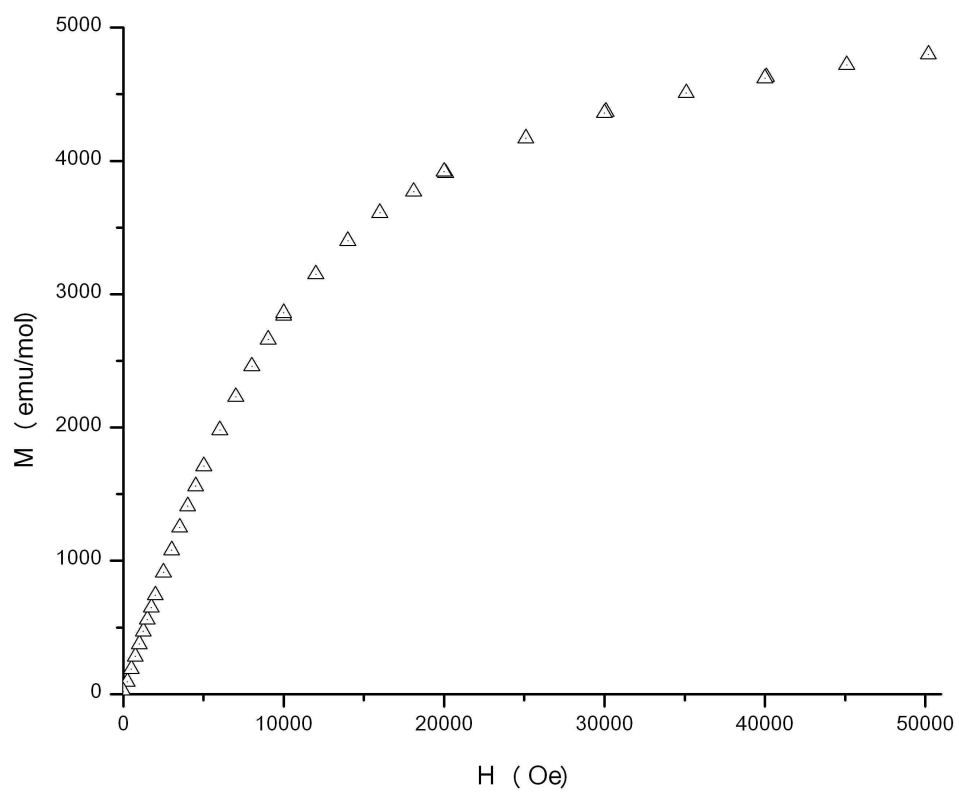

**Figure S19.** Uncorrected plot of magnetic susceptibility as a function of temperature for **8**.

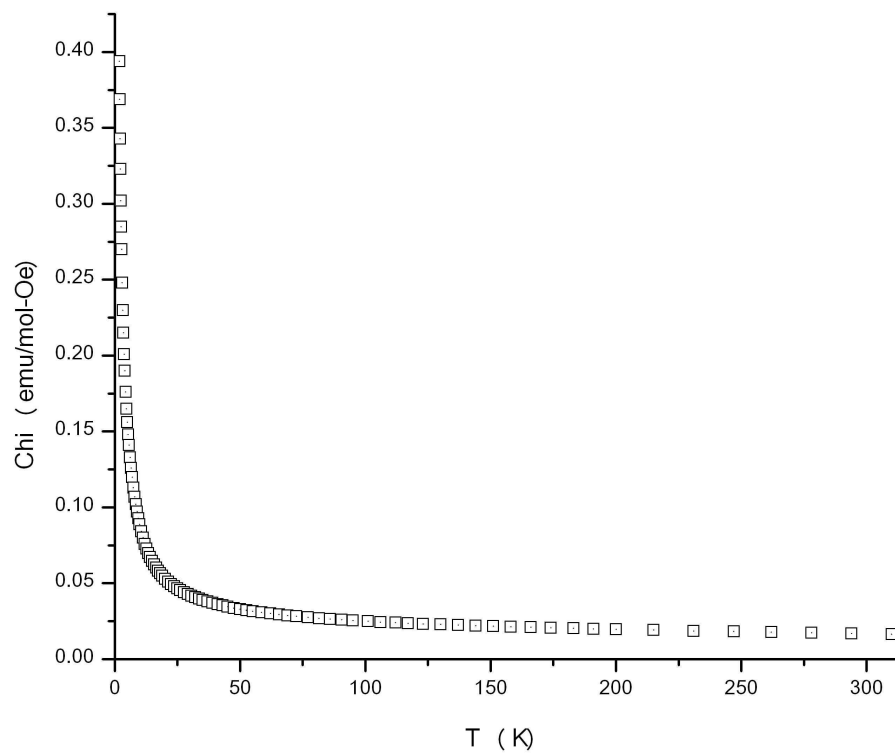

**Figure S20.** Calculated frontier molecular orbital energies and representations of **4** derived from DFT calculations using Gaussian 09 (BP86/LANL2TZ(f)/6-311+G(d)/D95V).

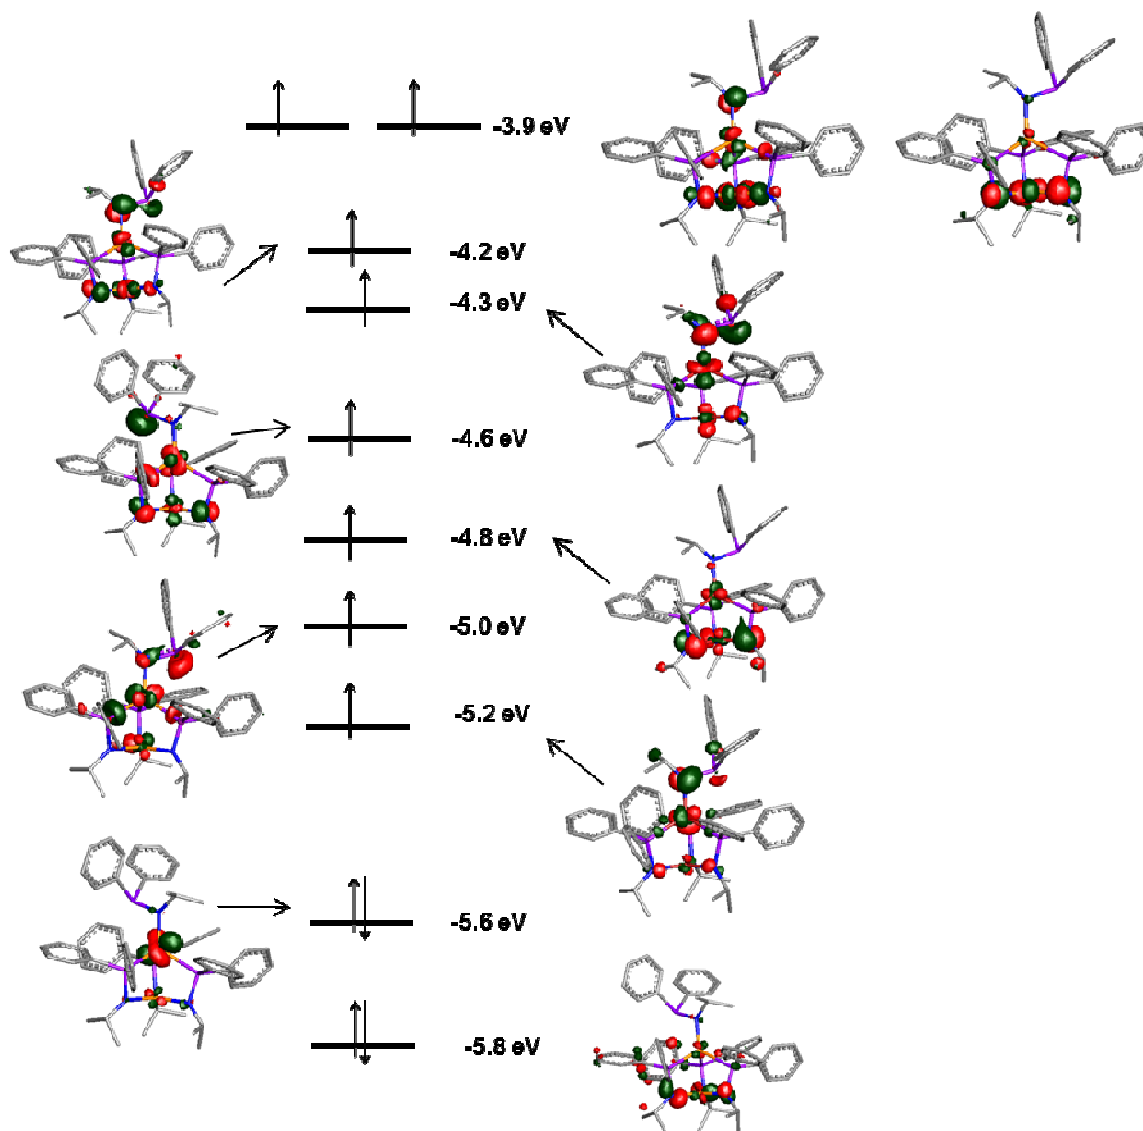

## Discussion of alternative fits for Mössbauer spectra of **6** and **7**

For both compounds **6** and **7**, two alternative fits of the zero-field  $^{57}\text{Fe}$  Mössbauer can be considered. For example, compound **6** contains two iron centers in disparate coordination environments. The first simulation fits the Mössbauer spectrum with two quadrupole doublets with essentially the same quadrupole splitting, suggesting that the two iron centers are electronically equivalent. This fitting is most consistent with a zwitterionic description of the diiron core. In this case, both iron centers would be in the 2+ oxidation state. Fe1 is bound to three amides and would therefore bear an overall negative charge. Fe2, bound to two neutral phosphines, two amides and one chloride, would bear an overall positive charge to complete the zwitterionic pair.

The alternate simulation of **6** fits the Mössbauer spectrum with two quadrupole doublets with very different quadrupole splittings ( $\delta = 0.27$  and  $0.99$  mm/s) more consistent with a mixed valent diiron compound (Fe(III) and Fe(I) respectively).

In both **6** and **7**, we favor the Mössbauer simulation that is consistent with the zwitterionic pair. Single crystal x-ray crystallography shows that the Fe-amide bond distances are consistent with previously reported compounds that feature Fe(II)-amide distances. Both the Mössbauer spectrum and the x-ray diffraction data were collected at similar temperatures ( $\sim 100$  K) and it is therefore appropriate to correlate these data.

### Compound **6**

Zero-field Mössbauer spectrum of compound **6** obtained at 110 K. Simulation (without impurity) yields the following parameters:  $\delta$ ,  $|AE_Q|$  (mm/s) component 1 (blue, 38%)  $0.63$ ,  $1.16$  ( $\gamma = 0.23$  mm/s); component 2 (green, 62%)  $0.69$ ,  $2.04$  ( $\gamma = 0.28$  mm/s).

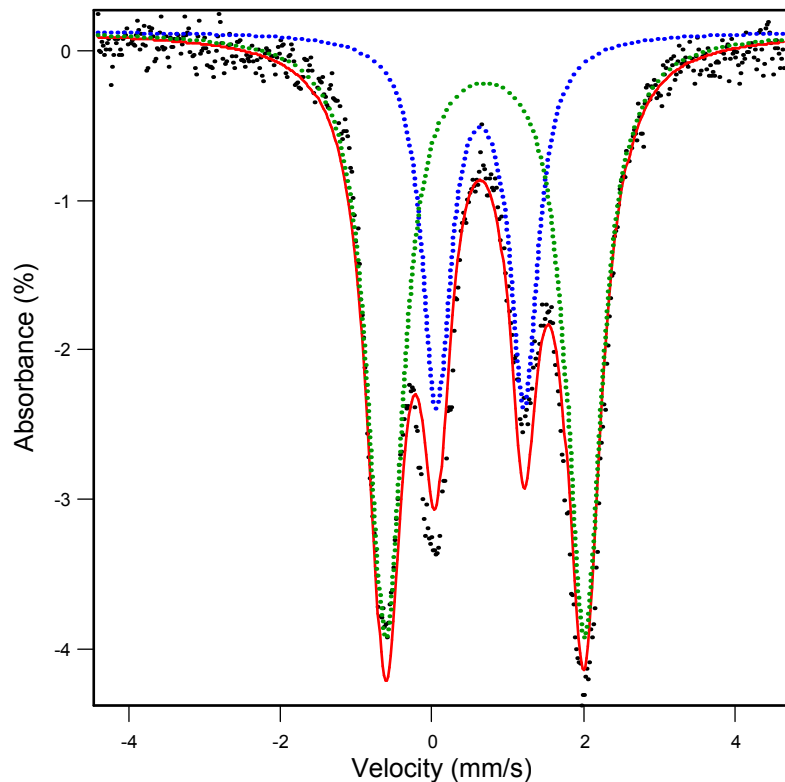

Simulation (with impurity) yields the following parameters:  $\delta$ ,  $|AE_Q|$  ( $\text{mm/s}$ ) component 1 (blue, 33%) 0.64, 1.12 ( $\gamma = 0.19 \text{ mm/s}$ ); component 2 (green, 33%) 0.66, 2.72 ( $\gamma = 0.19 \text{ mm/s}$ ); component 3 (orange – impurity) 0.78, 2.38 ( $\gamma = 0.30 \text{ mm/s}$ ).

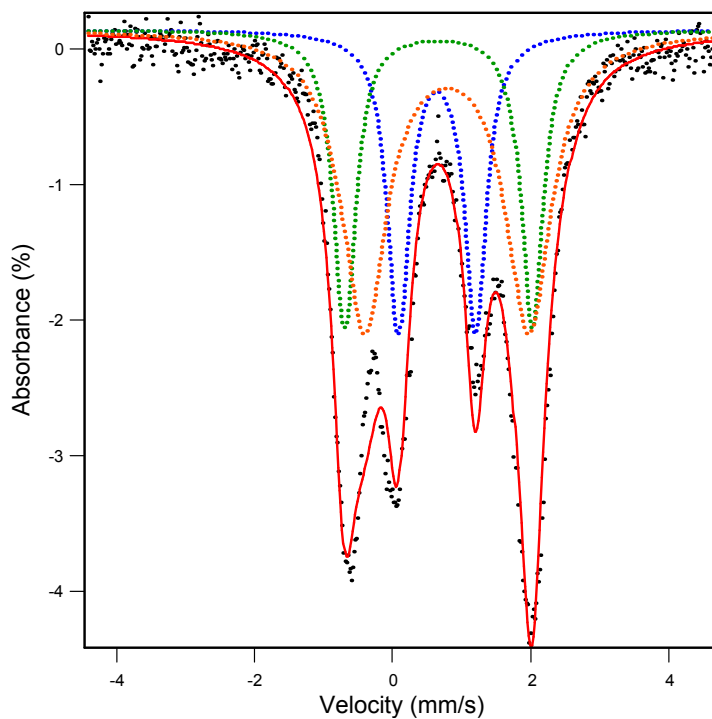

An alternate simulation (without impurity) yields the following parameters:  $\delta$ ,  $|AE_Q|$  ( $\text{mm/s}$ ) component 1 (blue, 42%) 0.27, 1.90 ( $\gamma = 0.20 \text{ mm/s}$ ); component 2 (green, 58%) 0.99, 2.04 ( $\gamma = 0.30 \text{ mm/s}$ ).

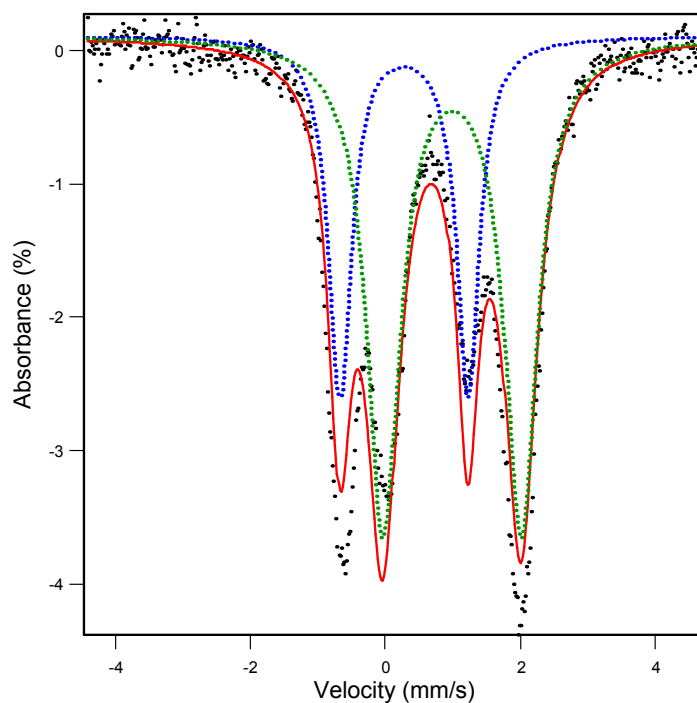

Simulation (with impurity) yields the following parameters:  $\delta$ ,  $|AE_Q|$  ( $\text{mm/s}$ ) component 1 (blue, 33%) 0.24, 1.89 ( $\gamma = 0.16 \text{ mm/s}$ ); component 2 (green, 33%) 1.05, 1.96 ( $\gamma = 0.22 \text{ mm/s}$ ); component 3 (orange – impurity) 0.74, 2.39 ( $\gamma = 0.38 \text{ mm/s}$ ).

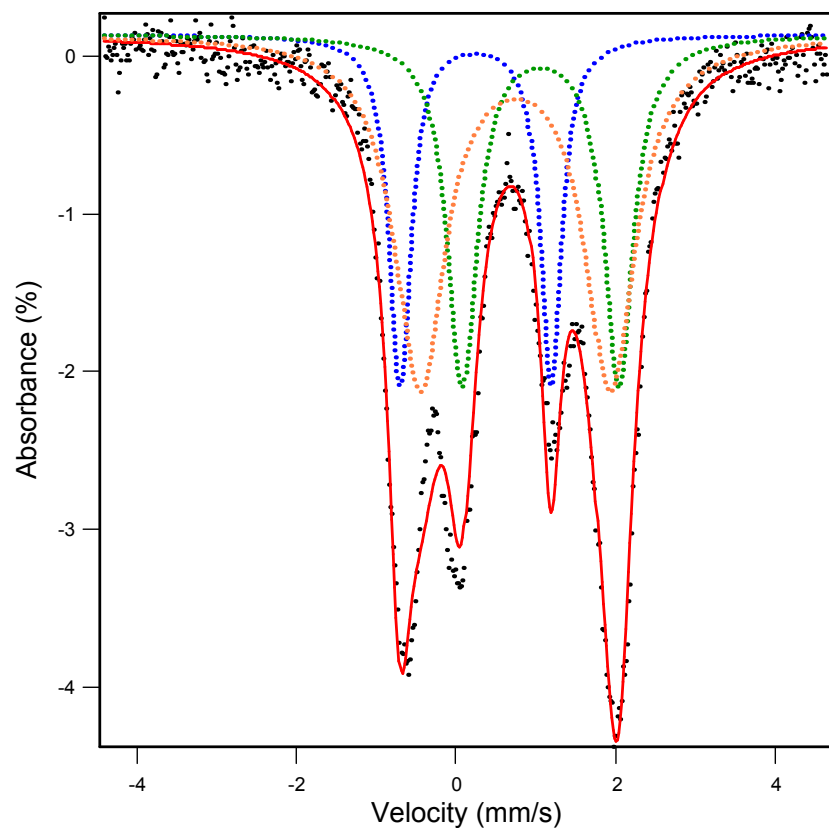

### Compound 7

Zero-field Mössbauer spectrum of compound **7** obtained at 110 K. Simulation yields the following parameters:  $\delta$ ,  $|AE_Q|$  (mm/s) component 1 (blue, 50%) 0.64, 2.77 ( $\gamma = 0.15$  mm/s); component 2 (green, 50%) 0.83, 1.27 ( $\gamma = 0.14$  mm/s).

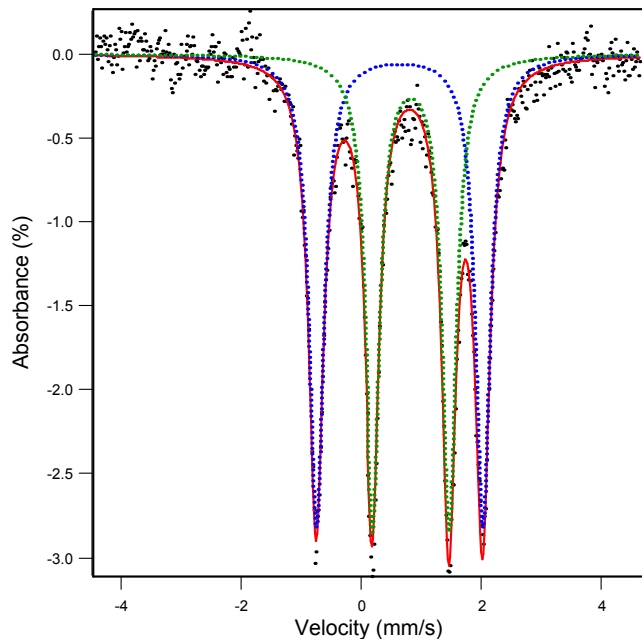

An alternative simulation yields the following parameters:  $\delta$ ,  $|AE_Q|$  (mm/s) component 1 (blue, 50%) 0.36, 2.22 ( $\gamma = 0.14$  mm/s); component 2 (green, 50%) 1.11, 1.83 ( $\gamma = 0.15$  mm/s).

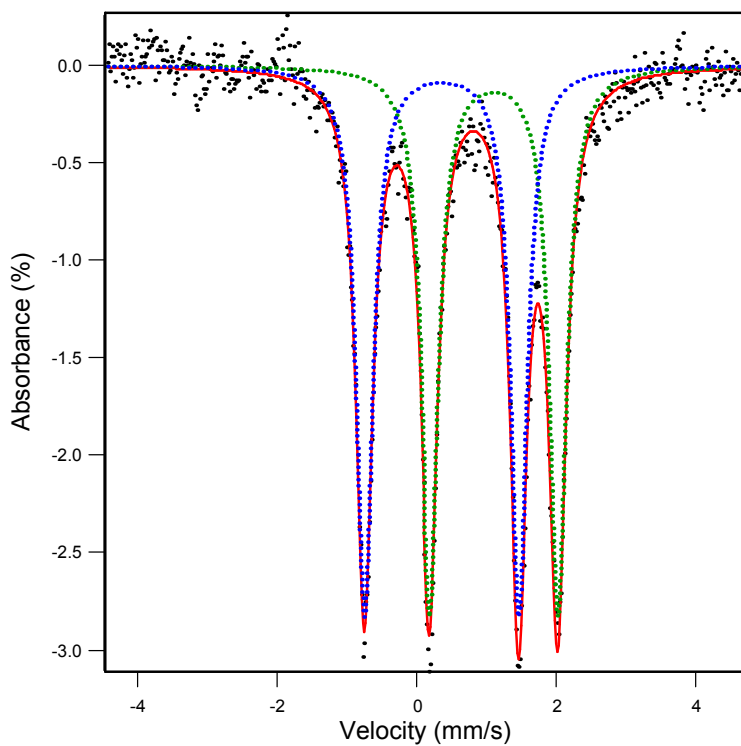



**Figure S21.** Molecular structure of  $\text{Mn}(\text{iPrNPPh}_2)_3\text{Mn}(\text{iPrNPPh}_2)$  (**3**). A lattice ether molecule and all hydrogen atoms have been omitted for clarity.

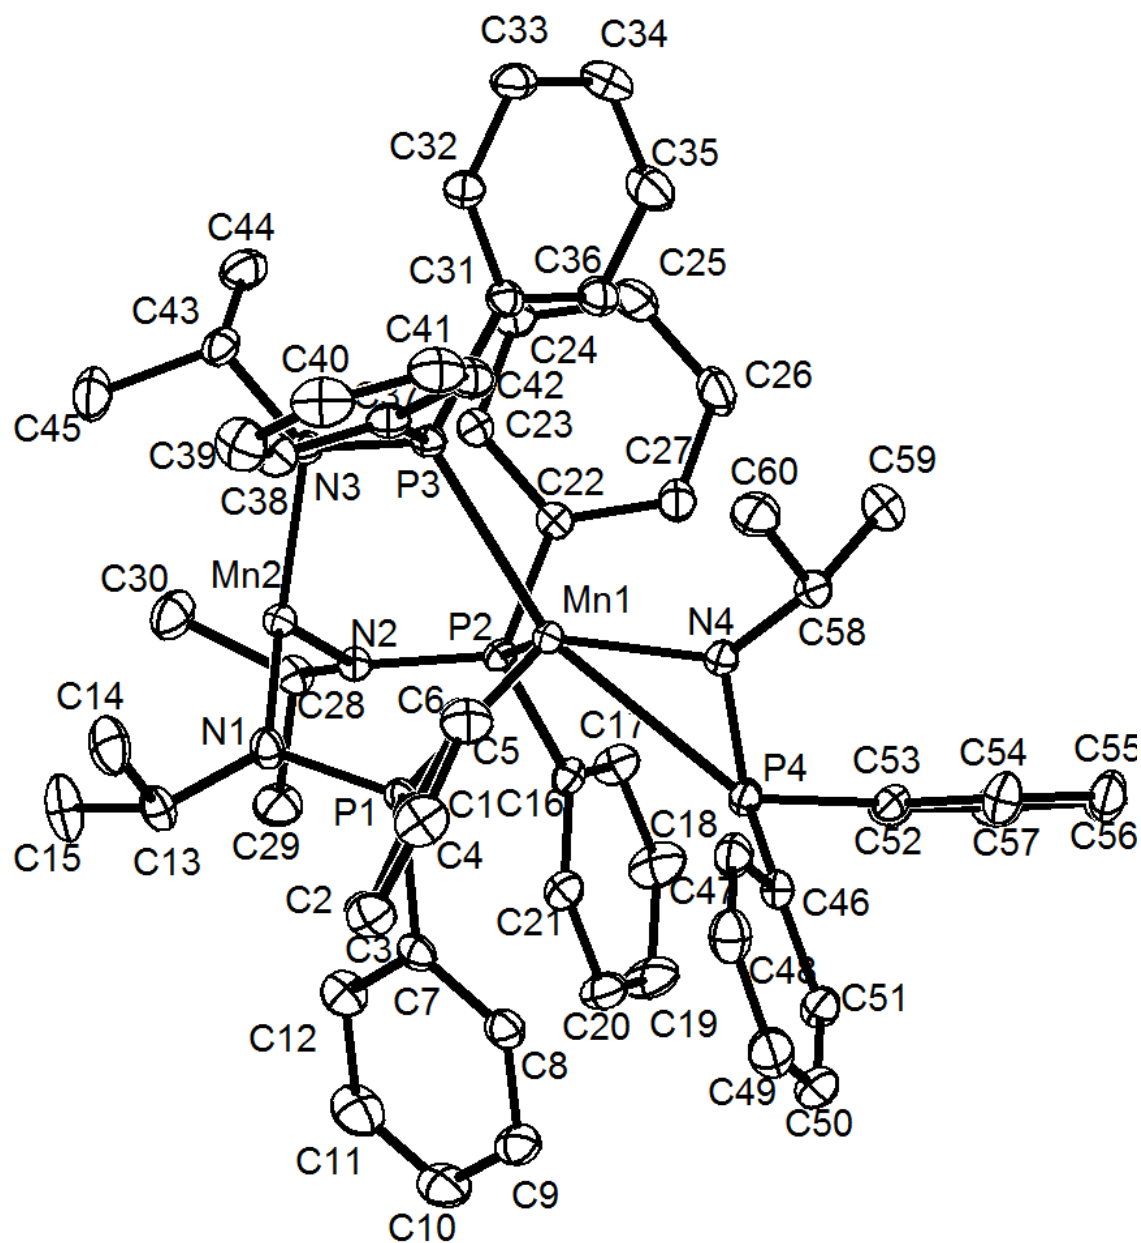

**X-ray data collection, solution, and refinement for  $\text{Mn}(\text{}^i\text{PrNPPPh}_2)_3\text{Mn}(\text{}^i\text{PrNPPPh}_2)$**

(3). All operations were performed on a Bruker-Nonius Kappa Apex2 diffractometer, using graphite-monochromated  $\text{MoK}\alpha$  radiation. All diffractometer manipulations, including data collection, integration, scaling, and absorption corrections were carried out using the Bruker Apex2 software.<sup>4</sup> Preliminary cell constants were obtained from three sets of 12 frames. Data collection was carried out at 120K, using a frame time of 5 sec and a detector distance of 75 mm. The optimized strategy used for data collection consisted of four phi and three omega scan sets, with  $0.5^\circ$  steps in phi or omega; completeness was 99.9%. A total of 2857 frames were collected. Final cell constants were obtained from the xyz centroids of 9734 reflections after integration.

From the systematic absences, the observed metric constants and intensity statistics, space group  $P2_1/c$  was chosen initially; subsequent solution and refinement confirmed the correctness of this choice. The structure was solved using *SuperFlip*,<sup>5</sup> and the remaining atoms were located on electron density difference maps. The structure was refined (full-matrix-least squares) using the Oxford University *Crystals for Windows* program.<sup>6</sup> All ordered non-hydrogen atoms were refined using anisotropic displacement parameters. Except as described below, after location of H atoms on electron-density difference maps, the H atoms attached to ordered atoms were initially refined with soft restraints on the bond lengths and angles to regularise their geometry (C---H in the range 0.93--0.98 Å and  $U_{iso}$  (H) in the range 1.2-1.5 times  $U_{eq}$  of the parent atom), after which the positions were refined with riding constraints.<sup>7</sup> A disordered ether solvate molecule resides near a center of symmetry; C atoms were refined by using anisotropic displacement parameters with fixed occupancies of 0.5. The O atom, very near a center of symmetry at (0,  $\frac{1}{2}$ , 0) was

refined by using an isotropic displacement parameter. Most H atoms were treated as described above, but those attached to C(61) were placed at geometric positions and refined with riding constraints. The final least-squares refinement converged to  $R_1 = 0.0349$  ( $I > 2\sigma(I)$ , 14249 data) and  $wR_2 = 0.0829$  ( $F^2$ , 17214 data, 662 parameters). The final CIF is available as supporting material.

**Figure S22.** Molecular structure of  $\text{Fe}(^i\text{PrNPPH}_2)_3\text{Fe}(^i\text{PrNPPH}_2)$  (**4**). All hydrogen atoms have been omitted for clarity.

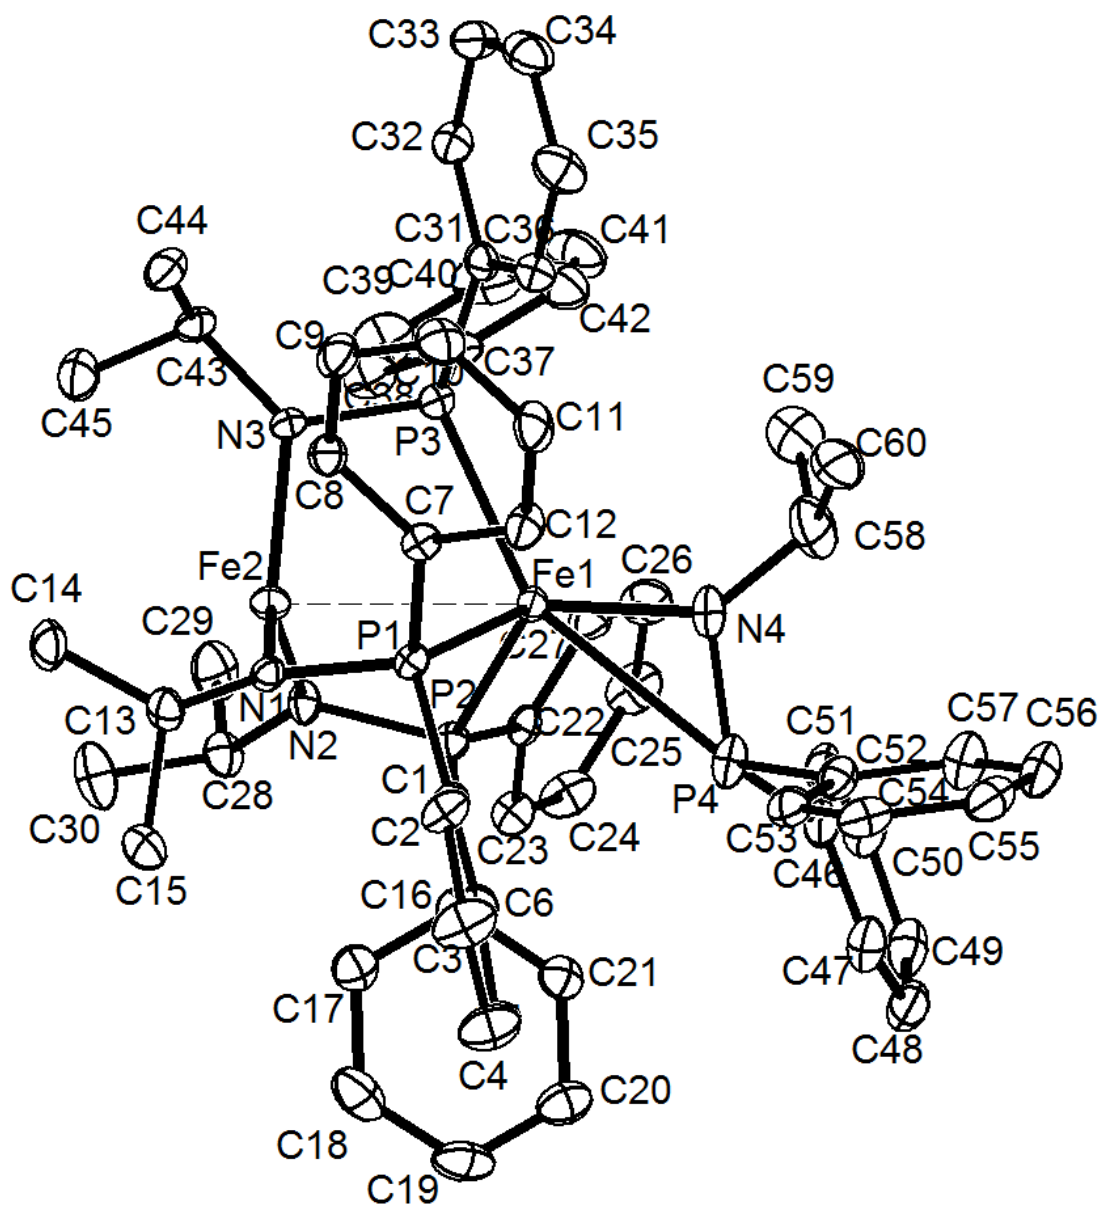

**X-Ray data collection, solution, and refinement for  $\text{Fe}(\text{}^i\text{PrNPPPh}_2)_3\text{Fe}(\text{}^i\text{PrNPPPh}_2)$  (4).**

All operations were performed on a Bruker-Nonius Kappa Apex2 diffractometer, using graphite-monochromated  $\text{MoK}\alpha$  radiation. All diffractometer manipulations, including data collection, integration, scaling, and absorption corrections were carried out using the Bruker Apex2 software.<sup>4</sup> Preliminary cell constants were obtained from three sets of 12 frames. Data collection carried out at 120K, using a frame time of 40 sec and a detector distance of 65 mm. The optimized strategy used for data collection consisted of two phi and three omega scan sets, with  $0.5^\circ$  steps in phi or omega; completeness was 99.5%. A total of 1648 frames were collected. Final cell constants were obtained from the xyz centroids of 6331 reflections after integration.

From the systematic absences and the observed metric constants and intensity statistics, space group  $P2_1/c$  was chosen initially; subsequent solution and refinement confirmed the correctness of this choice. The structure was solved using *SuperFlip* and subsequent electron-density difference syntheses.<sup>5</sup> Refinement (full-matrix-least squares) was carried out using the Oxford University *Crystals for Windows* program.<sup>6</sup> All non-hydrogen atoms were refined using anisotropic displacement parameters. After location of H atoms on electron-density difference maps, the H atoms were initially refined with soft restraints on the bond lengths and angles to regularise their geometry (C---H in the range 0.93--0.98 Å and  $U_{iso}$  (H) in the range 1.2-1.5 times  $U_{eq}$  of the parent atom), after which the positions were refined with riding constraints.<sup>7</sup> During the structure solution, electron density difference maps revealed that there were considerable disordered solvent molecules. From history, the solvate was likely  $\text{Et}_2\text{O}$  in a volume of  $470.6 \text{ Å}^3$  per unit cell (8.1%); the peaks could not be modeled successfully. It appeared that the cavity areas

contained about two diethyl ether molecules, located near the centers of symmetry

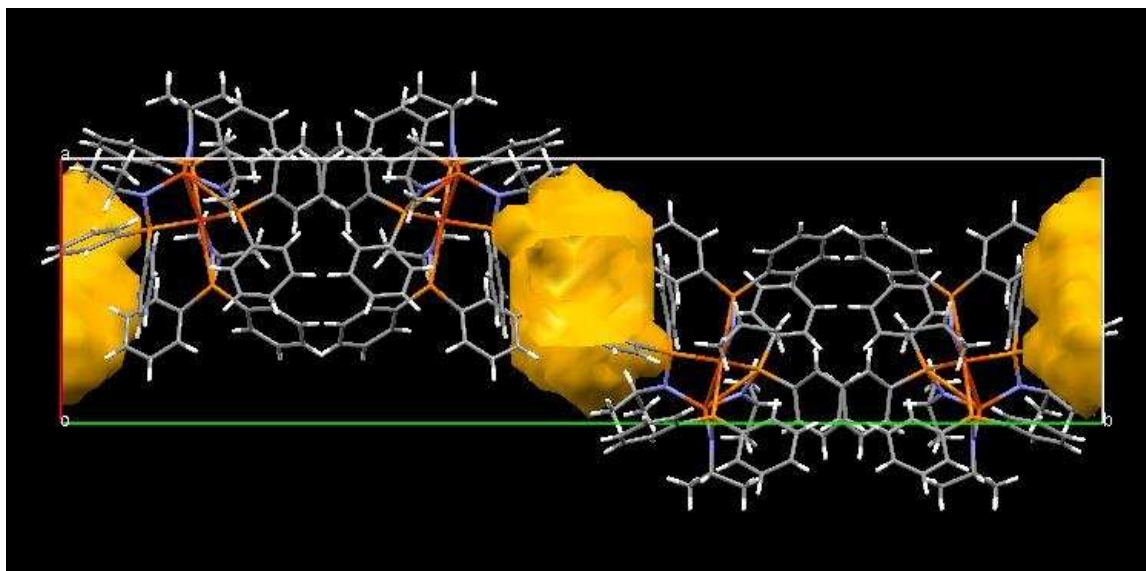

at  $(\frac{1}{2}, \frac{1}{2}, 0)$  and  $(\frac{1}{2}, 0, \frac{1}{2})$  as shown in the *ab* projection above.<sup>8</sup> Modeling with or without restraints was unsuccessful, as was step by step acquisition of peaks using successive electron density difference maps. Thus, the structure factors were modified using the PLATON SQUEEZE<sup>9,10</sup> technique, in order to produce a “solvate-free” structure factor set. PLATON reported a total electron density of 97 e<sup>-</sup> per unit cell, likely representing 2-3 diethyl ether molecules, consistent with our earlier observations. Use of the SQUEEZE technique resulted in a decrease of ca 2.1 % in *R*. The final least-squares refinement converged to  $R_1 = 0.0476$  ( $I > 2\sigma(I)$ , 8253 data) and  $wR_2 = 0.0959$  ( $F^2$ , 12677 data, 631 parameters). The final CIF is available as supporting material; we note that the CheckCIF routine produced an alert G item, related to the void volume described above. Accordingly, the CIF file contains a section (`_platon_squeeze_details`) which explains the issue in detail.

**Figure S23.** Molecular structure of  $[(\text{THF})\text{Mn}(\mu\text{-Cl})(\text{MesNP}^i\text{Pr}_2)_3\text{Mn}(\text{MesNP}^i\text{Pr}_2)]$  (**5**).

All hydrogen atoms have been omitted for clarity.

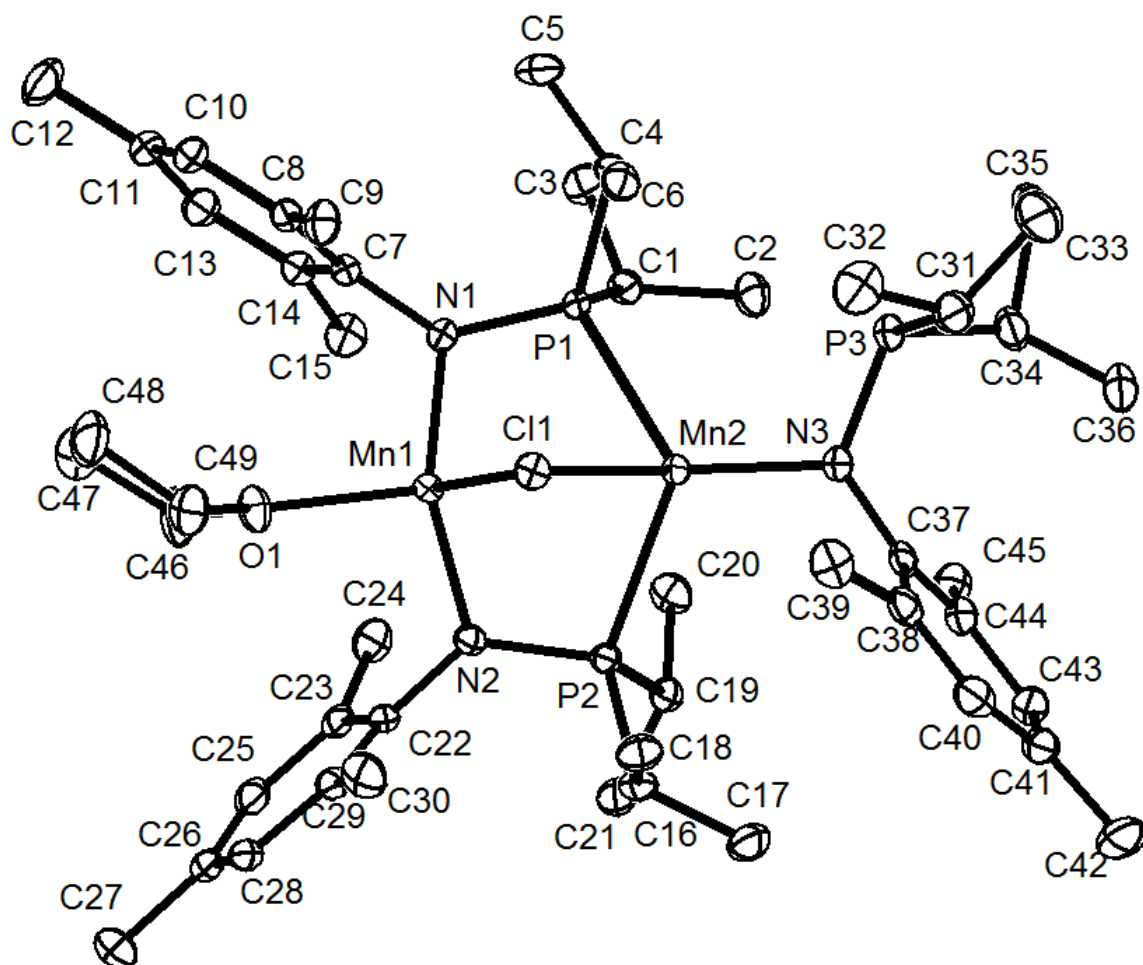

**X-Ray data collection, solution, and refinement for [(THF)Mn( $\mu$ -Cl)(MesNP<sup>i</sup>Pr<sub>2</sub>)<sub>3</sub>Mn(MesNP<sup>i</sup>Pr<sub>2</sub>)] (5).** All operations were performed on a Bruker-Nonius Kappa Apex2 diffractometer, using graphite-monochromated MoK $\alpha$  radiation. All diffractometer manipulations, including data collection, integration, scaling, and absorption corrections were carried out using the Bruker Apex2 software.<sup>4</sup> Preliminary cell constants were obtained from three sets of 12 frames. Data collection was carried out at 120K, using a frame time of 30 sec and a detector distance of 60 mm. The optimized strategy used for data collection consisted of three phi scan sets, with 0.5° steps in phi; completeness was 99.1%. A total of 1915 frames were collected. Final cell constants were obtained from the xyz centroids of 9909 reflections after integration.

From the systematic absences, the observed metric constants and intensity statistics, space group  $P2_1/c$  was chosen initially; subsequent solution and refinement confirmed the correctness of this choice. The structure was solved using *SIR-92*,<sup>5</sup> and refined (full-matrix-least squares) using the Oxford University *Crystals for Windows* program.<sup>6</sup> All non-hydrogen atoms were refined using anisotropic displacement parameters. After location of H atoms on electron-density difference maps, the H atoms were initially refined with soft restraints on the bond lengths and angles to regularize their geometry (C---H in the range 0.93--0.98 Å and  $U_{iso}$  (H) in the range 1.2-1.5 times  $U_{eq}$  of the parent atom), after which the positions were refined with riding constraints.<sup>7</sup> The final least-squares refinement converged to  $R_1 = 0.0336$  ( $I > 2\sigma(I)$ , 9411 data) and  $wR_2 = 0.0836$  ( $F^2$ , 12814 data, 532 parameters). The final CIF is available as supporting material.



**Figure S24.** Molecular structure of  $[\text{Fe}(\text{MesNP}^i\text{Pr}_2)_3\text{FeCl}]$  (**6**). A lattice pentane molecule and all hydrogen atoms have been omitted for clarity.

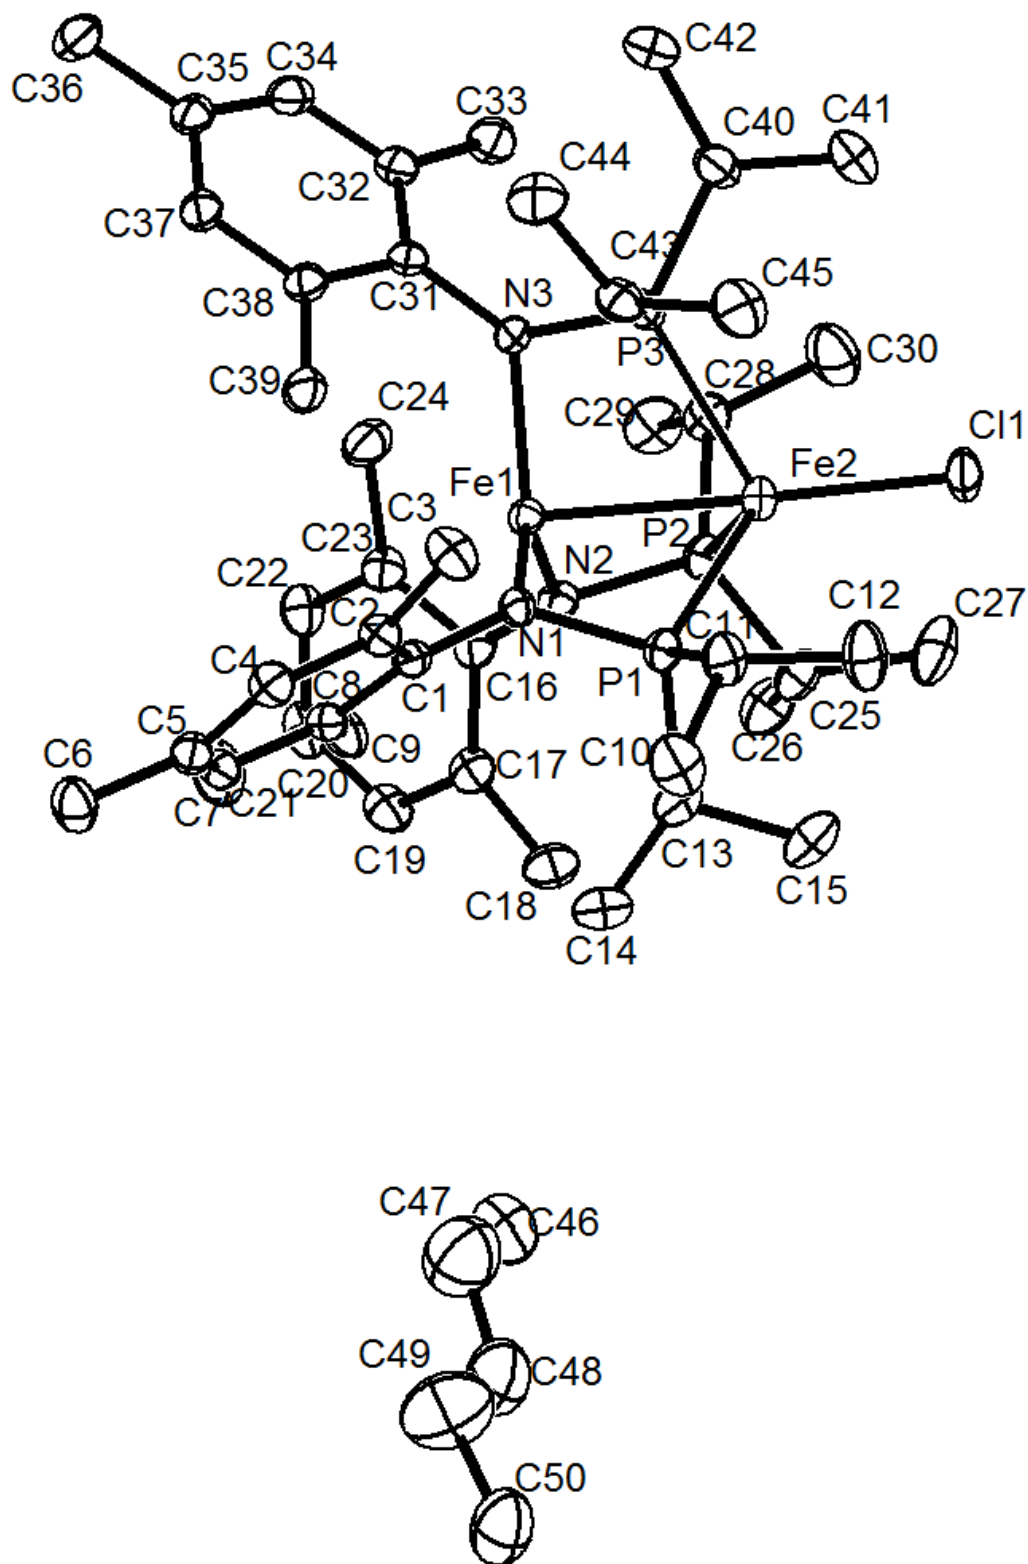

**X-Ray data collection, solution, and refinement for [Fe(MesNP<sup>i</sup>Pr<sub>2</sub>)<sub>3</sub>FeCl] (6).** All operations were performed on a Bruker-Nonius Kappa Apex2 diffractometer, using graphite-monochromated MoK $\alpha$  radiation. All diffractometer manipulations, including data collection, integration, scaling, and absorption corrections were carried out using the Bruker Apex2 software.<sup>4</sup> Preliminary cell constants were obtained from three sets of 12 frames. Data collection was carried out at 120K, using a frame time of 20 sec and a detector distance of 60 mm. The optimized strategy used for data collection consisted of six phi and one omega scan sets, with 0.5° steps in phi or omega; completeness was 99.4 %. A total of 3623 frames were collected. Final cell constants were obtained from the xyz centroids of 9944 reflections after integration.

From the systematic absences, the observed metric constants and intensity statistics, space group  $P\bar{1}$  was chosen initially; subsequent solution and refinement confirmed the correctness of this choice. The structure was solved using *SuperFlip*,<sup>5</sup> and refined (full-matrix-least squares) using the Oxford University *Crystals for Windows* program.<sup>6</sup> All non-hydrogen atoms were refined using anisotropic displacement parameters. After location of H atoms on electron-density difference maps, the H atoms were initially refined with soft restraints on the bond lengths and angles to regularize their geometry (C---H in the range 0.93--0.98 Å and  $U_{iso}$  (H) in the range 1.2-1.5 times  $U_{eq}$  of the parent atom), after which the positions were refined with riding constraints.<sup>7</sup> The final least-squares refinement converged to  $R_1 = 0.0410$  ( $I > 2\sigma(I)$ , 11542 data) and  $wR_2 = 0.1198$  ( $F^2$ , 15469 data, 532 parameters). The final CIF is available as supporting material.

**Figure S25.** Molecular structure of  $[(\text{THF})\text{Fe}(\mu\text{-I})(\text{MesNP}^i\text{Pr}_2)_2\text{FeI}]$  (**7**). All hydrogen atoms have been omitted for clarity.

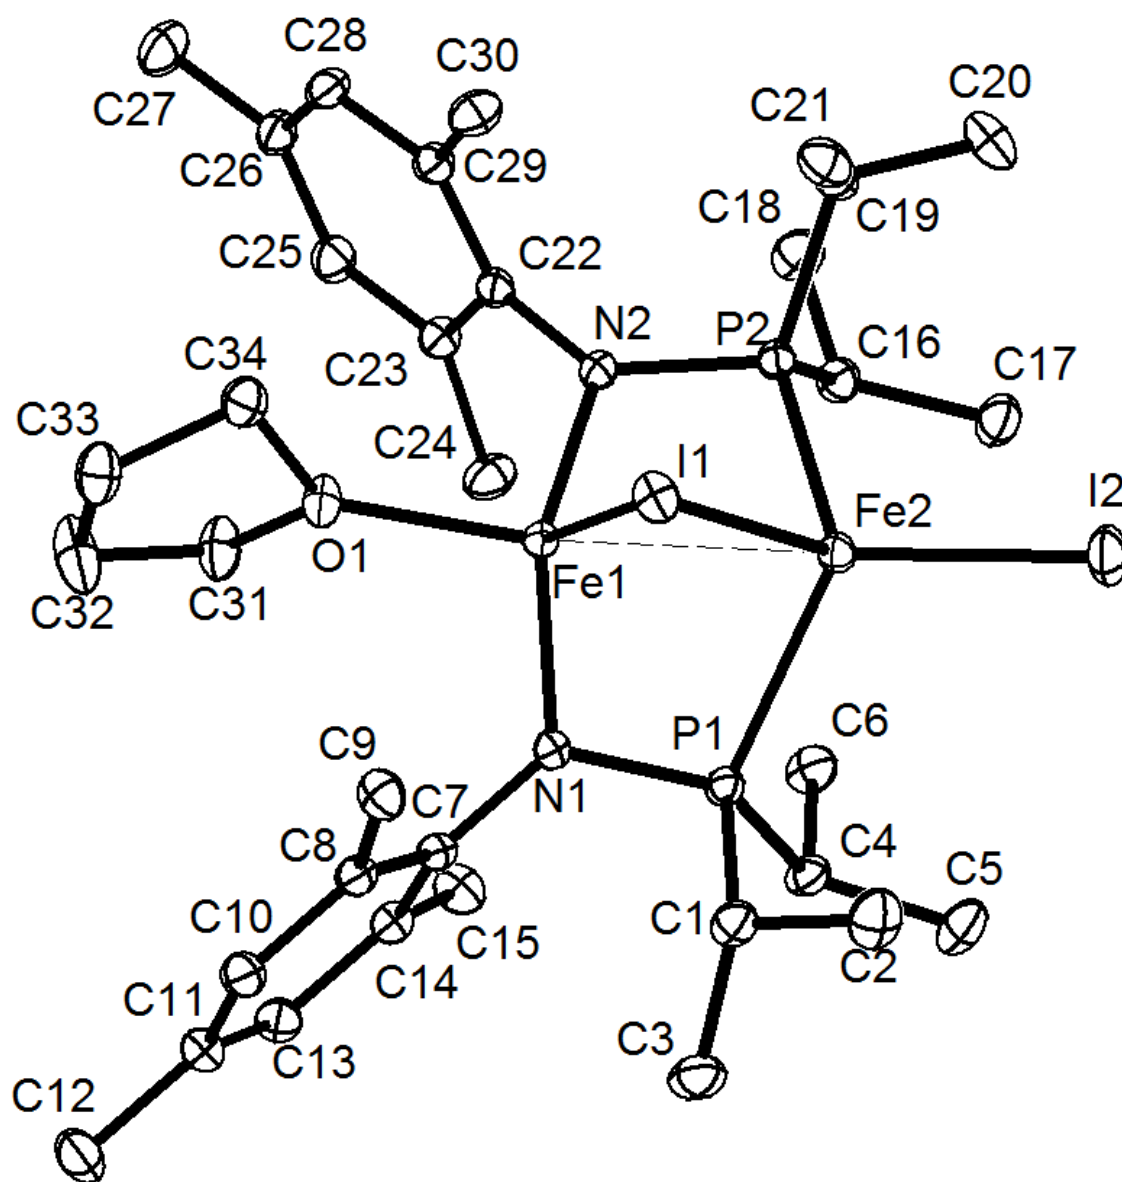

**X-Ray data collection, solution, and refinement for [(THF)Fe( $\mu$ -I)(MesNP<sup>*i*</sup>Pr<sub>2</sub>)<sub>2</sub>FeI]**

(7). All operations were performed on a Bruker-Nonius Kappa Apex2 diffractometer, using graphite-monochromated MoK $\alpha$  radiation. All diffractometer manipulations, including data collection, integration, scaling, and absorption corrections were carried out using the Bruker Apex2 software.<sup>4</sup> Preliminary cell constants were obtained from three sets of 12 frames. Data collection was carried out at 120K, using a frame time of 10 sec and a detector distance of 60 mm. The optimized strategy used for data collection consisted of six phi and three omega scan sets, with 0.5° steps in phi or omega; completeness was 98.8%. A total of 4166 frames were collected. Final cell constants were obtained from the xyz centroids of 9768 reflections after integration.

From the systematic absences, the observed metric constants and intensity statistics, space group  $P\bar{1}$  was chosen initially; subsequent solution and refinement confirmed the correctness of this choice. The structure was solved using *SuperFlip*,<sup>5</sup> and refined (full-matrix-least squares) using the Oxford University *Crystals for Windows* program.<sup>6</sup> All non-hydrogen atoms were refined using anisotropic displacement parameters. After location of H atoms on electron-density difference maps, the H atoms were initially refined with soft restraints on the bond lengths and angles to regularize their geometry (C---H in the range 0.93--0.98 Å and  $U_{iso}$  (H) in the range 1.2-1.5 times  $U_{eq}$  of the parent atom), after which the positions were refined with riding constraints.<sup>7</sup> The final least-squares refinement converged to  $R_1 = 0.0195$  ( $I > 2\sigma(I)$ , 9938 data) and  $wR_2 = 0.0465$  ( $F^2$ , 11290 data, 388 parameters). The final CIF is available as supporting material.

**Figure S26.** Molecular structure of  $(\text{THF})_3\text{LiCl}[\text{Mn}(\text{N}^i\text{PrP}^i\text{Pr}_2)_2(\text{P}^i\text{Pr}_2\text{N}^i\text{Pr})\text{MnCl}]$  (**8**). Cationic part of  $(\text{THF})_3\text{Li}$ , and all hydrogen atoms have been omitted for clarity.

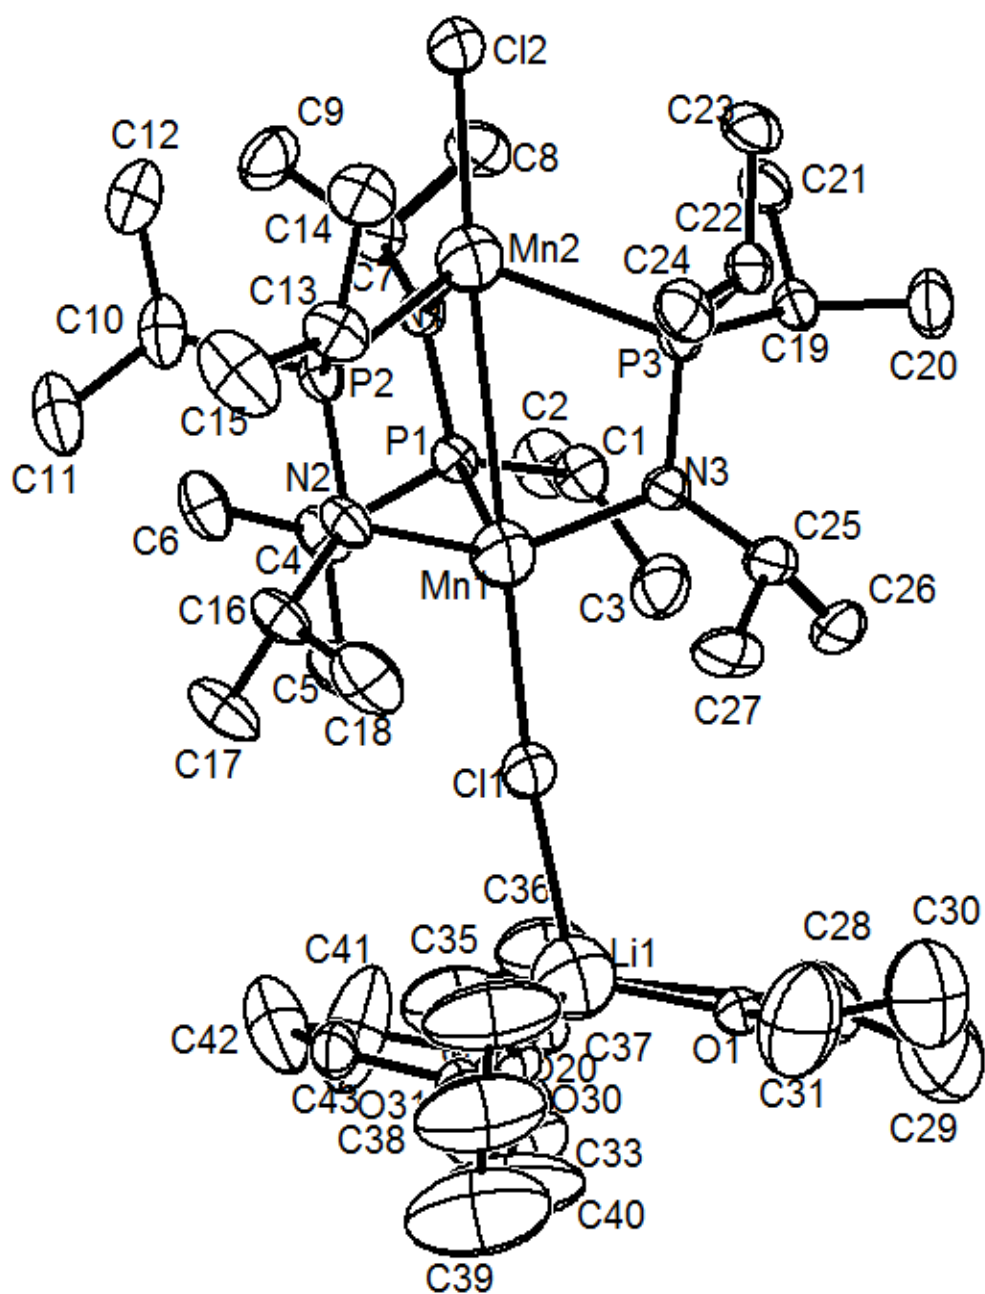

**X-Ray data collection, solution, and refinement for (THF)<sub>3</sub>LiCl[Mn(N<sup>i</sup>PrP<sup>i</sup>Pr<sub>2</sub>)<sub>2</sub>(P<sup>i</sup>Pr<sub>2</sub>N<sup>i</sup>Pr)MnCl] (8).** All operations were performed on a Bruker-Nonius Kappa Apex2 diffractometer, using graphite-monochromated MoK $\alpha$  radiation. All diffractometer manipulations, including data collection, integration, scaling, and absorption corrections were carried out using the Bruker Apex2 software.<sup>1.a.i.4</sup> Preliminary cell constants were obtained from three sets of 12 frames. Data collection was carried out at 120 K, using a frame time of 30 sec and a detector distance of 60 mm. The optimized strategy used for data collection consisted of four phi and three omega scan sets, with 0.5° steps in phi or omega; completeness was 98.2%. A total of 2757 frames were collected. Final cell constants were obtained from the xyz centroids of 8213 reflections after integration.

From the lack of systematic absences, and the observed metric constants and intensity statistics, space group  $P\bar{1}$  was chosen initially; subsequent solution and refinement confirmed the correctness of this choice. The structure was solved using *SIR-92*.<sup>1.a.i.5</sup> The structure was refined (full-matrix-least squares) using the Oxford University *Crystals for Windows* program.<sup>1.a.i.6</sup> All non-hydrogen atoms were refined using anisotropic displacement parameters. The asymmetric unit contains one molecule of complex, and a mixture of THF and ether molecules weakly bound to a lithium ion. There was considerable disorder in the THF and ether molecules, and thermal similarity restraints were used to help model the three (partial) THF molecules. One of the THF moieties (O(1)/C(28)/C(29)/C(30)/C(31)) was refined as a fully-occupied species. The other two THF molecules occupied positions that were shared (in different ratios) with ether molecules. The first shared pair involved THF atoms O(20)/C(35)/C(36), common atoms

C(33)/C(34) (occupancy 1.0), and ether atoms O(21)/C(41), with methyl ether atom C(42) common to the two partial ether molecules(!). The second shared pair involved THF atoms O(30)/C(37)/C(38), common atoms C(39)/C(40) (occupancy 1.0), and ether atoms O(31)/C(43) with methyl ether atom C(42), as stated above, common to the two partial ether molecules. In each case the sum of the ether and THF occupancies were constrained to sum to 1.0. The refined occupancies of the first and second THF:ether pairs were: 0.516(7):0.484(7) and 0.691(7):0.309(7), respectively. The occupancy of common methyl ether atom C(42) was effectively constrained (using a tight restraint, 0.0003) to the sum of the occupancies of the two ether molecule occupancies,  $0.48424 + 0.30923 = 0.79346$ . Thus, the final composition of the solvate molecules bound to lithium is  $\text{Li}(\text{C}_4\text{H}_8\text{O})_{2.207}(\text{C}_4\text{H}_{10}\text{O})_{0.793}$ . The fourth coordination position around Li is filled by atom Cl(1). After location of most ordered H atoms on electron-density difference maps, the H atoms attached to ordered C atoms were initially refined with soft restraints on the bond lengths and angles to regularise their geometry (C---H in the range 0.93--0.98 Å and  $U_{iso}$  (H) in the range 1.2-1.5 times  $U_{eq}$  of the parent atom), after which the positions were refined with riding constraints.<sup>1.a.i.7</sup> The remaining H atoms on disordered THF or ether carbon atoms were placed at geometric positions and refined with riding constraints. The final least-squares refinement converged to  $R_1 = 0.0550$  ( $I > 2\sigma(I)$ , 9279 data) and  $wR_2 = 0.1444$  ( $F^2$ , 13083 data, 526 parameters). The final CIF is available as supporting material. The CheckCIF routine returned four Alert B messages, related to the disorder described above; accordingly, the CIF and CheckCIF results now contain validation response form (\_vrf) items which explain the Alert B items.

**Figure S27.** Molecular structure of  $[\text{Fe}(\text{N}^i\text{PrP}^i\text{Pr}_2)_2(\text{P}^i\text{Pr}_2\text{N}^i\text{Pr})\text{FeCl}]$  (**9**). All hydrogen atoms have been omitted for clarity.

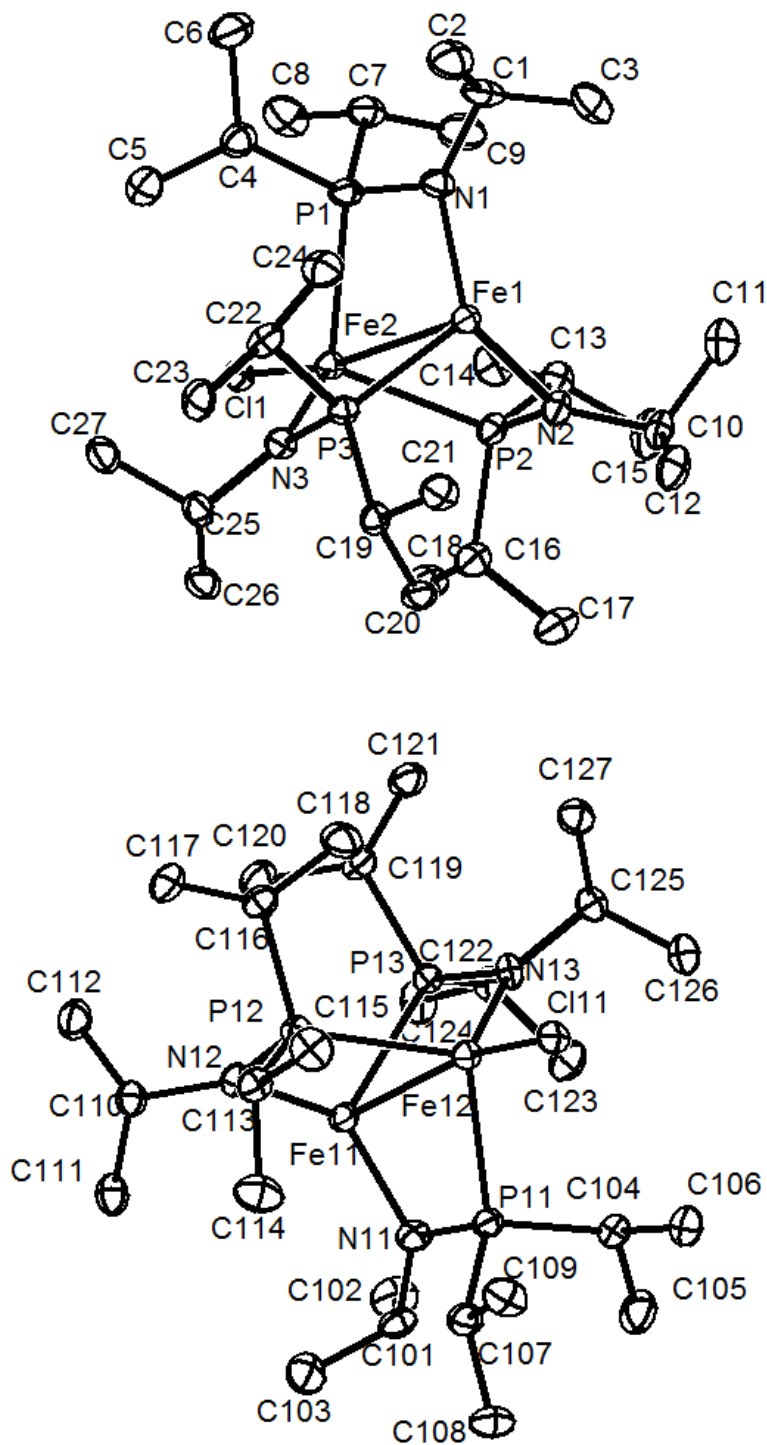



**X-Ray data collection, solution, and refinement for [Fe(N<sup>i</sup>PrP<sup>i</sup>Pr<sub>2</sub>)<sub>2</sub>(P<sup>i</sup>Pr<sub>2</sub>N<sup>i</sup>Pr)FeCl] (9).** All operations were performed on a Bruker-Nonius Kappa Apex2 diffractometer, using graphite-monochromated MoK $\alpha$  radiation. All diffractometer manipulations, including data collection, integration, scaling, and absorption corrections were carried out using the Bruker Apex2 software.<sup>4</sup> Preliminary cell constants were obtained from three sets of 12 frames. Data collection was carried out at 120K, using a frame time of 30 sec and a detector distance of 60 mm. The optimized strategy used for data collection consisted of three phi and five omega scan sets, with 0.5° steps in phi or omega; completeness was 98.6%. A total of 2554 frames were collected. Final cell constants were obtained from the xyz centroids of 7470 reflections after integration. From the systematic absences, the observed metric constants and intensity statistics, space group  $P\bar{1}$  was chosen initially; subsequent solution and refinement confirmed the correctness of this choice. The structure was solved using *SIR-92*,<sup>5</sup> and refined (full-matrix-least squares) using the Oxford University *Crystals for Windows* program.<sup>6</sup> All non-hydrogen atoms were refined using anisotropic displacement parameters. After location of H atoms on electron-density difference maps, the H atoms were initially refined with soft restraints on the bond lengths and angles to regularize their geometry (C---H in the range 0.93--0.98 Å and  $U_{iso}$  (H) in the range 1.2-1.5 times  $U_{eq}$  of the parent atom), after which the positions were refined with riding constraints.<sup>7</sup> The final least-squares refinement converged to  $R_1 = 0.0472$  ( $I > 2\sigma(I)$ , 9411 data) and  $wR_2 = 0.1191$  ( $F^2$ , 13823 data, 649 parameters). The final CIF is available as supporting material.

## Gaussian 09 Full Reference

Gaussian 09, Revision **A.1**, Frisch, M. J.; Trucks, G. W.; Schlegel, H. B.; Scuseria, G. E.; Robb, M. A.; Cheeseman, J. R.; Scalmani, G.; Barone, V.; Mennucci, B.; Petersson, G. A.; Nakatsuji, H.; Caricato, M.; Li, X.; Hratchian, H. P.; Izmaylov, A. F.; Bloino, J.; Zheng, G.; Sonnenberg, J. L.; Hada, M.; Ehara, M.; Toyota, K.; Fukuda, R.; Hasegawa, J.; Ishida, M.; Nakajima, T.; Honda, Y.; Kitao, O.; Nakai, H.; Vreven, T.; Montgomery, Jr., J. A.; Peralta, J. E.; Ogliaro, F.; Bearpark, M.; Heyd, J. J.; Brothers, E.; Kudin, K. N.; Staroverov, V. N.; Kobayashi, R.; Normand, J.; Raghavachari, K.; Rendell, A.; Burant, J. C.; Iyengar, S. S.; Tomasi, J.; Cossi, M.; Rega, N.; Millam, N. J.; Klene, M.; Knox, J. E.; Cross, J. B.; Bakken, V.; Adamo, C.; Jaramillo, J.; Gomperts, R.; Stratmann, R. E.; Yazyev, O.; Austin, A. J.; Cammi, R.; Pomelli, C.; Ochterski, J. W.; Martin, R. L.; Morokuma, K.; Zakrzewski, V. G.; Voth, G. A.; Salvador, P.; Dannenberg, J. J.; Dapprich, S.; Daniels, A. D.; Farkas, Ö.; Foresman, J. B.; Ortiz, J. V.; Cioslowski, J.; Fox, D. J. Gaussian, Inc., Wallingford CT, 2009.

XYZ coordinates of DFT optimized structure of **4**

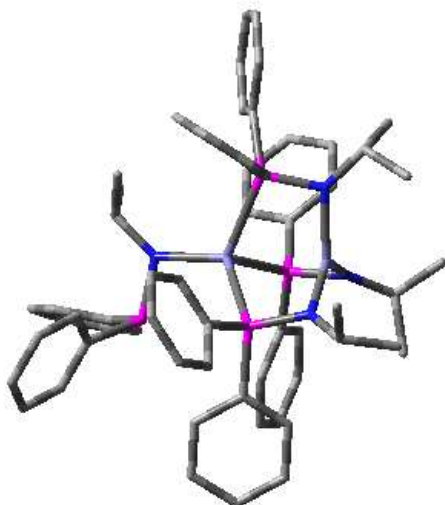

| Tag | Symbol | X        | Y        | Z        |
|-----|--------|----------|----------|----------|
| 1   | Fe     | 0.067012 | -0.02708 | -0.35033 |
| 2   | Fe     | 1.707082 | -0.15304 | 1.757938 |
| 3   | P      | -0.13254 | -2.07128 | 1.064138 |
| 4   | P      | -0.16937 | 1.879157 | 1.25084  |
| 5   | P      | 2.583269 | 0.041774 | -0.92193 |
| 6   | P      | -2.74046 | 0.160817 | -1.11966 |
| 7   | N      | 0.94267  | -1.84788 | 2.342299 |
| 8   | N      | 1.085242 | 1.619324 | 2.341526 |
| 9   | N      | 3.284997 | -0.21465 | 0.579235 |
| 10  | N      | -1.20845 | -0.0901  | -1.84247 |
| 11  | C      | -1.78707 | -2.51932 | 1.800096 |
| 12  | C      | -2.12554 | -3.8623  | 2.13041  |
| 13  | C      | -3.33332 | -4.15795 | 2.804773 |
| 14  | C      | -4.22268 | -3.11468 | 3.162303 |
| 15  | C      | -3.89563 | -1.77644 | 2.836405 |
| 16  | C      | -2.68922 | -1.48225 | 2.160023 |
| 17  | C      | 0.288217 | -3.67202 | 0.218865 |
| 18  | C      | 1.473588 | -4.3835  | 0.5391   |
| 19  | C      | 1.797863 | -5.58244 | -0.13862 |
| 20  | C      | 0.945708 | -6.07933 | -1.15422 |
| 21  | C      | -0.23021 | -5.36354 | -1.49508 |
| 22  | C      | -0.55428 | -4.16736 | -0.81581 |
| 23  | C      | 0.968459 | -2.66722 | 3.585553 |
| 24  | C      | 2.429319 | -2.84946 | 4.064665 |

|    |   |          |          |          |
|----|---|----------|----------|----------|
| 25 | C | 0.113098 | -2.02707 | 4.710752 |
| 26 | C | -1.7244  | 2.103332 | 2.244676 |
| 27 | C | -1.77324 | 1.648425 | 3.589336 |
| 28 | C | -2.95543 | 1.782075 | 4.354148 |
| 29 | C | -4.1132  | 2.358252 | 3.777557 |
| 30 | C | -4.07943 | 2.796321 | 2.429926 |
| 31 | C | -2.89501 | 2.670734 | 1.668627 |
| 32 | C | -0.02929 | 3.567631 | 0.474491 |
| 33 | C | -0.38778 | 4.760472 | 1.163689 |
| 34 | C | -0.19458 | 6.025076 | 0.56333  |
| 35 | C | 0.360202 | 6.118752 | -0.73763 |
| 36 | C | 0.713954 | 4.939085 | -1.43385 |
| 37 | C | 0.516452 | 3.675522 | -0.83087 |
| 38 | C | 1.526342 | 2.597151 | 3.375093 |
| 39 | C | 2.646489 | 3.535834 | 2.852188 |
| 40 | C | 2.009872 | 1.838305 | 4.634497 |
| 41 | C | 3.253468 | -1.20489 | -2.13718 |
| 42 | C | 4.52879  | -1.05152 | -2.75249 |
| 43 | C | 5.052533 | -2.06159 | -3.59122 |
| 44 | C | 4.309793 | -3.24379 | -3.83171 |
| 45 | C | 3.042985 | -3.40824 | -3.22287 |
| 46 | C | 2.522532 | -2.39795 | -2.38132 |
| 47 | C | 3.330747 | 1.613436 | -1.59971 |
| 48 | C | 3.872962 | 2.547547 | -0.67736 |
| 49 | C | 4.420034 | 3.772925 | -1.12074 |
| 50 | C | 4.422489 | 4.093386 | -2.4992  |
| 51 | C | 3.870867 | 3.176781 | -3.42862 |
| 52 | C | 3.329219 | 1.948249 | -2.98356 |
| 53 | C | 4.729889 | -0.49242 | 0.80278  |
| 54 | C | 5.010811 | -2.01877 | 0.812161 |
| 55 | C | 5.189754 | 0.146354 | 2.135272 |
| 56 | C | -3.43004 | 1.731688 | -1.84676 |
| 57 | C | -4.80997 | 2.045769 | -1.66597 |
| 58 | C | -5.33081 | 3.294121 | -2.07649 |
| 59 | C | -4.48114 | 4.262416 | -2.6699  |
| 60 | C | -3.10834 | 3.966658 | -2.84404 |
| 61 | C | -2.58994 | 2.715738 | -2.43348 |
| 62 | C | -3.93861 | -1.06979 | -1.87721 |
| 63 | C | -4.2104  | -2.26304 | -1.1502  |
| 64 | C | -5.07047 | -3.25769 | -1.67537 |
| 65 | C | -5.68169 | -3.07435 | -2.93894 |
| 66 | C | -5.43239 | -1.88501 | -3.66809 |

|     |   |          |          |          |
|-----|---|----------|----------|----------|
| 67  | C | -4.57274 | -0.89388 | -3.14077 |
| 68  | C | -1.0873  | -0.2796  | -3.32231 |
| 69  | C | 0.191886 | 0.392986 | -3.86591 |
| 70  | C | -1.11133 | -1.77969 | -3.7183  |
| 71  | H | -1.45109 | -4.68083 | 1.853852 |
| 72  | H | -3.57588 | -5.19891 | 3.051261 |
| 73  | H | -5.1598  | -3.3428  | 3.684266 |
| 74  | H | -4.57594 | -0.95814 | 3.099001 |
| 75  | H | -2.45879 | -0.44683 | 1.896507 |
| 76  | H | 2.141448 | -3.9859  | 1.311167 |
| 77  | H | 2.714656 | -6.1243  | 0.123755 |
| 78  | H | 1.194249 | -7.01137 | -1.67597 |
| 79  | H | -0.8936  | -5.73572 | -2.28529 |
| 80  | H | -1.46671 | -3.62106 | -1.08495 |
| 81  | H | 0.54806  | -3.67173 | 3.361952 |
| 82  | H | 2.464987 | -3.4506  | 4.993735 |
| 83  | H | 3.0449   | -3.35284 | 3.297312 |
| 84  | H | 2.884013 | -1.86187 | 4.275482 |
| 85  | H | 0.125314 | -2.65918 | 5.620745 |
| 86  | H | -0.93322 | -1.89669 | 4.387727 |
| 87  | H | 0.525132 | -1.03331 | 4.970542 |
| 88  | H | -0.8834  | 1.182433 | 4.026275 |
| 89  | H | -2.97225 | 1.433821 | 5.39409  |
| 90  | H | -5.03043 | 2.464673 | 4.369404 |
| 91  | H | -4.97169 | 3.236555 | 1.968824 |
| 92  | H | -2.88454 | 3.022921 | 0.630982 |
| 93  | H | -0.83314 | 4.701347 | 2.164042 |
| 94  | H | -0.47939 | 6.933874 | 1.107415 |
| 95  | H | 0.510487 | 7.100515 | -1.20279 |
| 96  | H | 1.147078 | 4.997268 | -2.43925 |
| 97  | H | 0.791518 | 2.765568 | -1.37636 |
| 98  | H | 0.658092 | 3.228327 | 3.667131 |
| 99  | H | 2.33752  | 4.041016 | 1.9218   |
| 100 | H | 3.563535 | 2.951315 | 2.647607 |
| 101 | H | 2.891204 | 4.307902 | 3.608457 |
| 102 | H | 2.843525 | 1.159614 | 4.368291 |
| 103 | H | 2.373111 | 2.544805 | 5.40554  |
| 104 | H | 1.197741 | 1.229514 | 5.071521 |
| 105 | H | 5.112794 | -0.13951 | -2.58271 |
| 106 | H | 6.036644 | -1.92433 | -4.05576 |
| 107 | H | 4.713948 | -4.02603 | -4.48539 |
| 108 | H | 2.458054 | -4.31877 | -3.39516 |

|     |   |          |          |          |
|-----|---|----------|----------|----------|
| 109 | H | 1.545896 | -2.54393 | -1.90717 |
| 110 | H | 3.853661 | 2.301192 | 0.389109 |
| 111 | H | 4.837367 | 4.476968 | -0.39074 |
| 112 | H | 4.848653 | 5.04237  | -2.84594 |
| 113 | H | 3.871452 | 3.411153 | -4.5004  |
| 114 | H | 2.929912 | 1.243202 | -3.721   |
| 115 | H | 5.319489 | -0.0311  | -0.02003 |
| 116 | H | 6.087359 | -2.22063 | 0.979692 |
| 117 | H | 4.431274 | -2.49253 | 1.626206 |
| 118 | H | 4.70973  | -2.48355 | -0.1418  |
| 119 | H | 5.057487 | 1.243143 | 2.120061 |
| 120 | H | 4.594853 | -0.26239 | 2.975257 |
| 121 | H | 6.256639 | -0.07598 | 2.330063 |
| 122 | H | -5.48192 | 1.306841 | -1.20998 |
| 123 | H | -6.39736 | 3.510136 | -1.93606 |
| 124 | H | -4.88386 | 5.231709 | -2.9873  |
| 125 | H | -2.43745 | 4.709255 | -3.29311 |
| 126 | H | -1.52381 | 2.500067 | -2.55815 |
| 127 | H | -3.76083 | -2.40673 | -0.16092 |
| 128 | H | -5.26745 | -4.16617 | -1.09325 |
| 129 | H | -6.35047 | -3.84217 | -3.34664 |
| 130 | H | -5.9075  | -1.72859 | -4.64462 |
| 131 | H | -4.40349 | 0.027901 | -3.71026 |
| 132 | H | -1.9582  | 0.215016 | -3.80436 |
| 133 | H | 0.216597 | 0.339043 | -4.97232 |
| 134 | H | 1.085562 | -0.12785 | -3.47965 |
| 135 | H | 0.245175 | 1.454956 | -3.56461 |
| 136 | H | -0.26654 | -2.309   | -3.24339 |
| 137 | H | -2.0508  | -2.26057 | -3.39878 |
| 138 | H | -1.01777 | -1.89097 | -4.81723 |

XYZ coordinates of DFT optimized structure of **6**

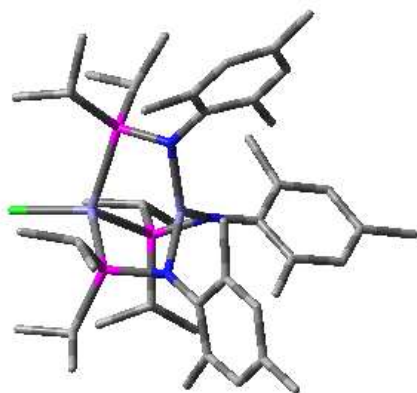

| Tag | Symbol | X        | Y        | Z        |
|-----|--------|----------|----------|----------|
| 1   | Fe     | -0.02371 | 0.002107 | 0.248456 |
| 2   | Fe     | 0.063377 | -0.13037 | -2.26769 |
| 3   | Cl     | 0.001397 | -0.29345 | -4.52827 |
| 4   | P      | 0.624582 | 2.106684 | -1.4436  |
| 5   | P      | 1.616651 | -1.69947 | -1.22468 |
| 6   | P      | -2.1608  | -0.64882 | -1.33412 |
| 7   | N      | 0.112598 | 2.026111 | 0.176213 |
| 8   | N      | 1.681842 | -1.08423 | 0.362396 |
| 9   | N      | -1.8155  | -0.87617 | 0.321997 |
| 10  | C      | 0.159164 | 3.028579 | 1.210099 |
| 11  | C      | -0.80498 | 4.090788 | 1.296198 |
| 12  | C      | -1.99984 | 4.212653 | 0.361501 |
| 13  | C      | -0.70396 | 5.049588 | 2.340028 |
| 14  | C      | 0.294617 | 4.990283 | 3.33723  |
| 15  | C      | 0.404485 | 6.05273  | 4.42115  |
| 16  | C      | 1.183522 | 3.887116 | 3.294054 |
| 17  | C      | 1.124187 | 2.91011  | 2.273422 |
| 18  | C      | 2.058462 | 1.719612 | 2.347679 |
| 19  | C      | 0.32825  | 4.959058 | -2.0463  |
| 20  | C      | -0.19228 | 3.537982 | -2.39812 |
| 21  | C      | -0.17863 | 3.323059 | -3.93646 |
| 22  | C      | 2.50367  | 2.358785 | -1.51684 |
| 23  | C      | 3.101953 | 3.566337 | -0.7456  |
| 24  | C      | 3.043165 | 2.290213 | -2.97148 |
| 25  | C      | 2.461225 | -1.53037 | 1.49054  |

|    |   |          |          |          |
|----|---|----------|----------|----------|
| 26 | C | 3.854115 | -1.21369 | 1.645316 |
| 27 | C | 4.620165 | -0.31375 | 0.686726 |
| 28 | C | 4.562348 | -1.69114 | 2.780964 |
| 29 | C | 3.946285 | -2.44505 | 3.804062 |
| 30 | C | 4.737122 | -2.97834 | 4.989701 |
| 31 | C | 2.552083 | -2.67086 | 3.686433 |
| 32 | C | 1.805623 | -2.21964 | 2.573317 |
| 33 | C | 0.305458 | -2.43375 | 2.568106 |
| 34 | C | 3.333017 | -1.79067 | -2.0428  |
| 35 | C | 4.273638 | -2.91893 | -1.53736 |
| 36 | C | 3.247906 | -1.81081 | -3.5945  |
| 37 | C | 0.885699 | -3.4492  | -1.21228 |
| 38 | C | 1.567885 | -4.50212 | -0.29743 |
| 39 | C | 0.664955 | -4.00025 | -2.64714 |
| 40 | C | -2.67947 | -1.23092 | 1.418801 |
| 41 | C | -3.09601 | -2.58432 | 1.664392 |
| 42 | C | -2.61179 | -3.77049 | 0.843506 |
| 43 | C | -3.94898 | -2.86947 | 2.764359 |
| 44 | C | -4.38814 | -1.87628 | 3.66748  |
| 45 | C | -5.33515 | -2.20166 | 4.813289 |
| 46 | C | -3.89579 | -0.56225 | 3.468848 |
| 47 | C | -3.04799 | -0.22904 | 2.387011 |
| 48 | C | -2.50108 | 1.181247 | 2.298634 |
| 49 | C | -3.03015 | -2.16944 | -2.0857  |
| 50 | C | -2.92021 | -2.2345  | -3.63349 |
| 51 | C | -4.50479 | -2.38275 | -1.6446  |
| 52 | C | -3.32509 | 0.83696  | -1.5358  |
| 53 | C | -4.65152 | 0.837934 | -0.72839 |
| 54 | C | -3.57426 | 1.181292 | -3.02954 |
| 55 | H | -2.90698 | 4.473821 | 0.937842 |
| 56 | H | -2.18721 | 3.263642 | -0.16456 |
| 57 | H | -1.8609  | 5.003832 | -0.39967 |
| 58 | H | -1.44926 | 5.857167 | 2.376495 |
| 59 | H | 1.942692 | 3.776246 | 4.081143 |
| 60 | H | 2.853512 | 1.881054 | 3.097477 |
| 61 | H | 1.515473 | 0.799829 | 2.64511  |
| 62 | H | 2.525036 | 1.495119 | 1.37589  |
| 63 | H | 0.596283 | 5.602044 | 5.41301  |
| 64 | H | -0.51997 | 6.653691 | 4.49289  |
| 65 | H | 1.239358 | 6.751959 | 4.214319 |
| 66 | H | -1.24496 | 3.454882 | -2.06567 |
| 67 | H | -0.38213 | 5.716275 | -2.43531 |



|     |   |          |          |          |
|-----|---|----------|----------|----------|
| 68  | H | 0.446155 | 5.122462 | -0.96155 |
| 69  | H | 1.301879 | 5.148679 | -2.53356 |
| 70  | H | -0.82096 | 4.091017 | -4.41261 |
| 71  | H | -0.55239 | 2.326971 | -4.22717 |
| 72  | H | 0.835852 | 3.432092 | -4.35842 |
| 73  | H | 2.829427 | 1.435926 | -0.99318 |
| 74  | H | 4.138163 | 2.12073  | -2.95703 |
| 75  | H | 2.575972 | 1.474777 | -3.55453 |
| 76  | H | 2.866613 | 3.240004 | -3.50912 |
| 77  | H | 4.192638 | 3.413048 | -0.61766 |
| 78  | H | 2.65654  | 3.69072  | 0.255063 |
| 79  | H | 2.966442 | 4.510156 | -1.301   |
| 80  | H | 5.629748 | -1.44224 | 2.868521 |
| 81  | H | 2.024278 | -3.20787 | 4.487133 |
| 82  | H | -0.00064 | -3.13314 | 3.366562 |
| 83  | H | -0.05777 | -2.816   | 1.601435 |
| 84  | H | -0.23857 | -1.48361 | 2.743948 |
| 85  | H | 4.182343 | -2.85026 | 5.938065 |
| 86  | H | 4.945625 | -4.0613  | 4.878055 |
| 87  | H | 5.709452 | -2.46338 | 5.091306 |
| 88  | H | 5.262761 | 0.384621 | 1.254687 |
| 89  | H | 5.282722 | -0.88557 | 0.009493 |
| 90  | H | 3.930788 | 0.280118 | 0.066658 |
| 91  | H | -0.11129 | -3.225   | -0.77984 |
| 92  | H | -0.03363 | -4.85977 | -2.61353 |
| 93  | H | 1.611497 | -4.36601 | -3.08623 |
| 94  | H | 0.241684 | -3.23901 | -3.32836 |
| 95  | H | 0.879137 | -5.35897 | -0.15273 |
| 96  | H | 1.82096  | -4.09781 | 0.696488 |
| 97  | H | 2.492237 | -4.89729 | -0.75228 |
| 98  | H | 3.767788 | -0.81405 | -1.75437 |
| 99  | H | 4.263189 | -1.662   | -4.01399 |
| 100 | H | 2.871507 | -2.7773  | -3.97293 |
| 101 | H | 2.587282 | -1.02127 | -3.99143 |
| 102 | H | 5.309184 | -2.71416 | -1.87668 |
| 103 | H | 3.979792 | -3.89359 | -1.96776 |
| 104 | H | 4.284192 | -3.01505 | -0.4382  |
| 105 | H | -4.1716  | 0.229096 | 4.180005 |
| 106 | H | -4.26063 | -3.91202 | 2.922214 |
| 107 | H | -2.36113 | -4.61637 | 1.510547 |
| 108 | H | -3.37984 | -4.13329 | 0.134237 |
| 109 | H | -1.71205 | -3.50861 | 0.265513 |

|     |   |          |          |          |
|-----|---|----------|----------|----------|
| 110 | H | -5.36598 | -3.28742 | 5.016105 |
| 111 | H | -6.3699  | -1.87817 | 4.582202 |
| 112 | H | -5.03485 | -1.68848 | 5.746031 |
| 113 | H | -3.0351  | 1.860106 | 2.987404 |
| 114 | H | -1.4284  | 1.215478 | 2.576033 |
| 115 | H | -2.56232 | 1.588327 | 1.277531 |
| 116 | H | -2.41607 | -2.9966  | -1.68005 |
| 117 | H | -4.81739 | -3.41571 | -1.89923 |
| 118 | H | -4.66239 | -2.2318  | -0.56332 |
| 119 | H | -5.17726 | -1.69791 | -2.19222 |
| 120 | H | -3.28985 | -3.22134 | -3.97815 |
| 121 | H | -3.53714 | -1.46058 | -4.12292 |
| 122 | H | -1.88466 | -2.10564 | -3.9895  |
| 123 | H | -2.67391 | 1.629318 | -1.11102 |
| 124 | H | -3.97412 | 2.211341 | -3.11463 |
| 125 | H | -4.32379 | 0.502387 | -3.47653 |
| 126 | H | -2.65124 | 1.118562 | -3.63513 |
| 127 | H | -5.05439 | 1.87036  | -0.69054 |
| 128 | H | -5.41831 | 0.204838 | -1.20695 |
| 129 | H | -4.51676 | 0.487622 | 0.30809  |

XYZ coordinates of DFT optimized structure of **9**

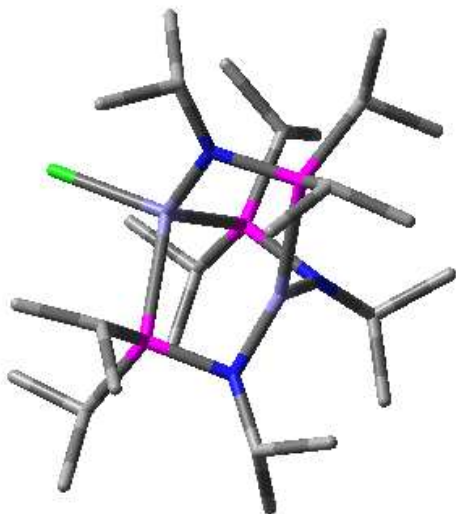

| Tag | Symbol | X        | Y        | Z        |
|-----|--------|----------|----------|----------|
| 1   | Fe     | 0.050013 | -0.19241 | 1.190896 |
| 2   | Fe     | -0.03893 | -0.00488 | -1.29396 |
| 3   | Cl     | -0.15237 | -0.71321 | -3.47581 |
| 4   | P      | 1.812929 | -1.43686 | -0.33539 |
| 5   | P      | -2.22659 | -0.54396 | -0.2066  |
| 6   | P      | 0.640722 | 2.144792 | 0.545328 |
| 7   | N      | 1.621073 | -1.30685 | 1.350131 |
| 8   | N      | -1.86049 | -0.37449 | 1.440416 |
| 9   | N      | 0.18991  | 1.925198 | -1.07174 |
| 10  | C      | 2.306379 | -2.13386 | 2.379146 |
| 11  | C      | 3.446013 | -1.35396 | 3.088672 |
| 12  | C      | 1.286932 | -2.63214 | 3.431794 |
| 13  | C      | 3.580038 | -0.87653 | -0.78747 |
| 14  | C      | 3.682367 | -0.35382 | -2.24552 |
| 15  | C      | 4.700771 | -1.90513 | -0.47668 |
| 16  | C      | 1.782433 | -3.28133 | -0.77562 |
| 17  | C      | 2.019258 | -3.54887 | -2.28576 |
| 18  | C      | 0.451391 | -3.92146 | -0.31175 |
| 19  | C      | -2.74998 | -0.6176  | 2.61078  |
| 20  | C      | -2.56483 | -2.04173 | 3.201698 |
| 21  | C      | -2.4748  | 0.447545 | 3.700912 |

|    |   |          |          |          |
|----|---|----------|----------|----------|
| 22 | C | -2.98136 | -2.26796 | -0.50313 |
| 23 | C | -2.87049 | -2.75052 | -1.97634 |
| 24 | C | -4.42819 | -2.47944 | 0.021607 |
| 25 | C | -3.49022 | 0.763841 | -0.75237 |
| 26 | C | -4.67334 | 1.056493 | 0.206487 |
| 27 | C | -3.97407 | 0.516437 | -2.20695 |
| 28 | C | -0.24614 | 3.671417 | 1.248263 |
| 29 | C | -1.76651 | 3.621664 | 0.96951  |
| 30 | C | 0.030126 | 3.79461  | 2.771386 |
| 31 | C | 2.478475 | 2.688335 | 0.569867 |
| 32 | C | 2.763186 | 4.187241 | 0.288116 |
| 33 | C | 3.20796  | 2.216865 | 1.855061 |
| 34 | C | 0.196535 | 2.997721 | -2.11411 |
| 35 | C | -1.09889 | 2.951635 | -2.96285 |
| 36 | C | 1.433218 | 2.879395 | -3.04502 |
| 37 | H | 2.756089 | -3.02832 | 1.893464 |
| 38 | H | 3.024207 | -0.50105 | 3.653524 |
| 39 | H | 3.981692 | -2.01053 | 3.802482 |
| 40 | H | 4.178541 | -0.95761 | 2.363462 |
| 41 | H | 1.786242 | -3.24369 | 4.208386 |
| 42 | H | 0.49466  | -3.23925 | 2.959327 |
| 43 | H | 0.808698 | -1.76523 | 3.928168 |
| 44 | H | 3.713447 | -0.01235 | -0.10366 |
| 45 | H | 4.673291 | 0.116086 | -2.40874 |
| 46 | H | 2.902104 | 0.394881 | -2.46417 |
| 47 | H | 3.570233 | -1.16737 | -2.98393 |
| 48 | H | 4.654201 | -2.28239 | 0.560819 |
| 49 | H | 5.691469 | -1.42731 | -0.61482 |
| 50 | H | 4.658748 | -2.77294 | -1.16037 |
| 51 | H | 2.612766 | -3.74102 | -0.1969  |
| 52 | H | 1.302422 | -2.98247 | -2.90739 |
| 53 | H | 1.879536 | -4.62836 | -2.49417 |
| 54 | H | 3.040433 | -3.27993 | -2.60909 |
| 55 | H | 0.201927 | -3.64619 | 0.728441 |
| 56 | H | -0.37672 | -3.596   | -0.96513 |
| 57 | H | 0.520083 | -5.02533 | -0.37591 |
| 58 | H | -3.80862 | -0.51494 | 2.293777 |
| 59 | H | -2.70714 | -2.81955 | 2.430507 |
| 60 | H | -1.54622 | -2.15163 | 3.614624 |
| 61 | H | -3.29182 | -2.22296 | 4.018311 |
| 62 | H | -3.0952  | 0.266711 | 4.600228 |
| 63 | H | -2.6875  | 1.464109 | 3.323879 |

|    |   |          |          |          |
|----|---|----------|----------|----------|
| 64 | H | -1.40909 | 0.408892 | 4.00184  |
| 65 | H | -2.29848 | -2.89233 | 0.110612 |
| 66 | H | -3.0509  | -3.84366 | -2.02024 |
| 67 | H | -3.62595 | -2.26439 | -2.61862 |
| 68 | H | -1.88155 | -2.53853 | -2.41874 |
| 69 | H | -4.69451 | -3.55265 | -0.06134 |
| 70 | H | -5.16025 | -1.91366 | -0.5832  |
| 71 | H | -4.54949 | -2.18432 | 1.078245 |
| 72 | H | -2.84533 | 1.664832 | -0.76422 |
| 73 | H | -5.26159 | 1.909499 | -0.18955 |
| 74 | H | -5.36048 | 0.196987 | 0.302773 |
| 75 | H | -4.31967 | 1.33729  | 1.214177 |
| 76 | H | -4.72504 | -0.29414 | -2.25015 |
| 77 | H | -4.45537 | 1.433984 | -2.5996  |
| 78 | H | -3.13942 | 0.255153 | -2.8833  |
| 79 | H | 0.170064 | 4.565401 | 0.739523 |
| 80 | H | -2.21428 | 2.696157 | 1.374598 |
| 81 | H | -1.97993 | 3.660312 | -0.11313 |
| 82 | H | -2.26634 | 4.487203 | 1.44855  |
| 83 | H | -0.51041 | 4.66961  | 3.183456 |
| 84 | H | 1.102783 | 3.928695 | 2.999017 |
| 85 | H | -0.32466 | 2.895548 | 3.310228 |
| 86 | H | 2.878303 | 2.101136 | -0.28296 |
| 87 | H | 3.85457  | 4.341645 | 0.167656 |
| 88 | H | 2.272312 | 4.548722 | -0.63352 |
| 89 | H | 2.434997 | 4.828796 | 1.127884 |
| 90 | H | 2.894575 | 2.798565 | 2.74256  |
| 91 | H | 3.004781 | 1.152028 | 2.055283 |
| 92 | H | 4.303327 | 2.349907 | 1.745169 |
| 93 | H | 0.234366 | 3.984802 | -1.60167 |
| 94 | H | -1.17508 | 1.978576 | -3.48159 |
| 95 | H | -1.08874 | 3.754729 | -3.72564 |
| 96 | H | -1.99608 | 3.084457 | -2.33141 |
| 97 | H | 2.377081 | 2.913791 | -2.47133 |
| 98 | H | 1.444703 | 3.704975 | -3.78401 |
| 99 | H | 1.388475 | 1.920969 | -3.59443 |

## References:

1. (a) Sisler, H. H.; Smith, N. L. *J. Org. Chem.* **1961**, 26, 611. (b) Poetschke, N.; Nieger, M.; Khan, M. A.; Niecke, E.; Ashby, M. T. *Inorg. Chem.* **1997**, 36, 4087.
2. Greenwood, B. P.; Forman, S. I.; Rowe, G. T.; Chen, C.-H.; Foxman, B. M.; Thomas, C. M. *Inorg. Chem.* **2009**, 48, 6251-6260.
3. (a) Sur, S. K. *J. Magn. Reson.* **1989**, 82, 169. (b) Evans, D. F. *J. Chem. Soc.* **1959**, 2003.
4. Apex2, Version 2 User Manual, M86-E01078, Bruker Analytical X-ray Systems, Madison, WI, June 2006.
5. (a) Altomare, A.; Cascarano, G.; Giacovazzo, G.; Guagliardi, A.; Burla, M. C.; Polidori, G.; Camalli, M. *J. Appl. Cryst.* **1994**, 27, 435. (b) Palatinus, L.; Chapuis, G. *J. Appl. Cryst.* **2007**, 40, 786.
6. (a) Betteridge, P. W.; Carruthers, J. R.; Cooper, R. I.; Prout, K.; Watkin, D. J. *J. Appl. Cryst.* **2003**, 36, 1487. (b) Prout, C.K.; Pearce, L. J. CAMERON, Chemical Crystallography Laboratory, Oxford, UK, 1996.
7. Cooper, R. I.; Thompson, A. L.; Watkin, D. J. *J. Appl. Cryst.* **2010**, 43, 1100.
8. Macrae, C. F.; Bruno, I. J.; Chisholm, J. A.; Edgington, P. R.; McCabe, P.; Pidcock, E.; Rodriguez-Monge, L.; Taylor, R.; van de Streek, J.; Wood, P. A. *J. Appl. Cryst.*, **2008**, 41, 466.
9. (a) Spek, A. L. *Acta Crystallogr., Sect. A.* **1990**, A46, C34. (b) PLATON, A Multipurpose Crystallographic Tool, Utrecht University, Utrecht, The Netherlands, Spek, A. L. 1998.
10. v. d. Sluis, P.; Spek, A. *Acta Crystallogr., Sect. A.* **1990**, A46, 194.
